# Supplementary material for: Regulating electron transfer and orbital interaction within metalloporphyrin-MOFs for highly sensitive NO2 sensing
Source: Royal Society of Chemistry journal article supplement (doi:10.1039/d3sc06909e), 2024-01-01
Supplement: d3sc06909e2.pdf [file d3sc06909e2.pdf]

## Supplementary Information

### Regulating Electron Transfer and Orbital Interaction within Metalloporphyrin-MOF for Highly Sensitive NO<sub>2</sub> Sensing

Er-Xia Chen,<sup>ab</sup> Liang He,<sup>a</sup> Mei Qiu,<sup>\*c</sup> Yongfan Zhang,<sup>d</sup> Yayong Sun,<sup>a</sup> Wen-Hua Li,<sup>a</sup> Jian-Ze Xiao,<sup>a</sup> Jie Chen,<sup>a</sup> Gang Xu,<sup>\*abe</sup> and Qipu Lin<sup>\*aef</sup>

<sup>a</sup>*State Key Laboratory of Structural Chemistry, Fujian Provincial Key Laboratory of Materials and Techniques toward Hydrogen Energy, Fujian Institute of Research on the Structure of Matter, Chinese Academy of Sciences, Fuzhou, Fujian 350002, China*

<sup>b</sup>*Fujian Science & Technology Innovation Laboratory for Optoelectronic Information of China, Fuzhou, Fujian 350108, China*

<sup>c</sup>*College of Chemistry and Materials, Jiangxi Agricultural University, Nanchang, Jiangxi 330045, China*

<sup>d</sup>*College of Chemistry, Fuzhou University, Fuzhou, Fujian 350116, China*

<sup>e</sup>*University of Chinese Academy of Sciences, Beijing 100049, China*

<sup>f</sup>*State Key Laboratory of Photocatalysis on Energy and Environment, Fuzhou University, Fuzhou, Fujian 350116, China*

Corresponding author E-mail: [qium@jxau.edu.cn](mailto:qium@jxau.edu.cn); [gxu@fjirsm.ac.cn](mailto:gxu@fjirsm.ac.cn);  
[linqipu@fjirsm.ac.cn](mailto:linqipu@fjirsm.ac.cn)

## Table of Contents

|                                                                      |    |
|----------------------------------------------------------------------|----|
| Section 1: General Methods .....                                     | 3  |
| Section 2: The Syntheses of Ligands .....                            | 3  |
| Section 3 The Synthesis of Crystalline Compounds .....               | 4  |
| Section 4 Powder X-ray Diffraction (PXRD).....                       | 5  |
| Section 5 The Morphology Characterization.....                       | 7  |
| Section 6 Gas Adsorption Measurements .....                          | 7  |
| Section 7 Ultraviolet-Visible (UV-vis) Absorption Spectroscopy ..... | 10 |
| Section 8 Gas Sensing Characterization .....                         | 10 |
| Section 9 X-ray Photoelectron Spectroscopy (XPS).....                | 18 |
| Section 10 Density Functional Theory (DFT) Calculations .....        | 20 |
| Section 11 References .....                                          | 34 |

## Section 1: General Methods

**Chemicals:** The chemicals were commercially available without further purification. 3,4-dimethoxybenzaldehyde and pyrrole were purchased from TCI (Shanghai) Development Co., Ltd. Boron tribromide ( $\text{BBr}_3$ ),  $\text{FeCl}_2$ ,  $\text{CoCl}_2 \cdot 6\text{H}_2\text{O}$ ,  $\text{Ni}(\text{NO}_3)_2 \cdot 6\text{H}_2\text{O}$  and  $\text{Zn}(\text{NO}_3)_2 \cdot 6\text{H}_2\text{O}$  were obtained from Aladdin (Shanghai) Development Co., Ltd.  $\text{FeCl}_2 \cdot 4\text{H}_2\text{O}$  was supplied by Shanghai Macklin Biochemical Co., Ltd. Ethanol, methanol, dichloromethane, trichloromethane, propionic acid, *N,N*-dimethylformamide and  $\text{In}(\text{NO}_3)_3 \cdot 4.5\text{H}_2\text{O}$  were purchased from Sinopharm Chemical Reagent Co., Ltd. The target gas was provided by Beijing Hua Yuan Gas Chemical Industry Co., Ltd., China.

**Instrumentations:** The powder X-ray diffraction (PXRD) patterns of the samples were carried out on the Rigaku Dmax 2500 X-ray diffractometer with  $\text{Cu K}\alpha$  radiation ( $\lambda = 1.54056 \text{ \AA}$ ). The gas adsorption measurements were performed on a Micromeritics ASAP 2020 surface area and pore size analyzer. The scanning electron microscopy (SEM) images were obtained by a Zeiss Sigma 500. Surface chemical analysis was performed on the X-ray photoelectron spectrometer (Thermo Fisher Scientific ESCALAB 250Xi). The interdigital electrodes of the sensor substrates which were provided by Beijing Elite Tech Co., Ltd.

## Section 2: The Syntheses of Ligands

**Synthesis of 5,10,15,20-tetrakis(3,4-dihydroxyphenyl)porphyrin-Fe (3,4-TDHPP-Fe):** 3,4-TDHPP-Fe was synthesized based on the previous literatures.<sup>1-3</sup> 3,4-TDMPP (1 mmol, 0.855 g, the synthesis method refers to our previous work<sup>1</sup>) and  $\text{FeCl}_2 \cdot 4\text{H}_2\text{O}$  (10 mmol, 1.99 g) were dissolved 150 ml  $\text{CH}_2\text{Cl}_2$  and 30 ml  $\text{CH}_3\text{OH}$ , respectively. Then the solution was mixed and refluxed under Ar atmosphere for 24 h. After cooling down to room temperature, the mixture was transferred into the separatory funnel and then 300 mL  $\text{H}_2\text{O}$  was introduced for 3 times to remove excess  $\text{FeCl}_2$ . The purple powder was obtained after the  $\text{CH}_2\text{Cl}_2$  solution was removed by evaporating, named 3,4-TDMPP-Fe. Then 3,4-TDMPP-Fe (1 mmol, 0.908 g) was dissolved in 20 mL

CH<sub>2</sub>Cl<sub>2</sub>. 1.5 mmol BBr<sub>3</sub> solution (1 mol/L in CH<sub>2</sub>Cl<sub>2</sub>) was added into 3,4-TDMPP-Fe solution under N<sub>2</sub> atmosphere by syringe at -78 °C and the reaction was maintained at -78 °C for 24 h. Then the reaction was terminated by adding 50 mL water after the reaction temperature rising naturally to room temperature. The solvents were removed by filtration and drying. Then olive-green product was obtained, named 3,4-TDHPP-Fe.

**Synthesis of 5,10,15,20-tetrakis(3,4-dihydroxyphenyl)porphyrin-M (3,4-TDHPP-M, M = Co, Ni and Zn):** The synthetic procedures of 3,4-TDHPP-M (M = Co, Ni and Zn) are similar to that of 3,4-TDHPP-Fe, except for CoCl<sub>2</sub>·6H<sub>2</sub>O, NiCl<sub>2</sub>·6H<sub>2</sub>O and Zn(NO<sub>3</sub>)<sub>2</sub>·6H<sub>2</sub>O instead of FeCl<sub>2</sub>·4H<sub>2</sub>O, respectively.

### **Section 3 The Synthesis of Crystalline Compounds**

#### **Synthesis of FeTCP-M (M = Fe, Co, Ni and Zn)**

The synthetic methods of FeTCP-M (M = Fe, Co, Ni and Zn) were similar to that in the previous literature<sup>1</sup> with some modification. FeCl<sub>2</sub> (0.075 mmol, 0.0095 g), 3,4-TDHPP-Fe (0.075 mmol, 0.0597 g), *N, N*-dimethylformamide (DMF, 3.0 mL), water (0.5 mL) and methanol (0.5 mL) were mixed in a 23 mL teflon-lined stainless steel container, then heated to 140 °C for 4 days. After cooling to room temperature, brown powder was obtained after washing with methanol and drying, named FeTCP-Fe (81% yield based on 3,4-TDHPP-Fe). The synthetic methods of FeTCP-M (M = Co, Ni and Zn) were similar to that of FeTCP-Fe, except for 3,4-TDHPP-Co (0.075 mmol, 0.0599 g), 3,4-TDHPP-Ni (0.075 mmol, 0.0599 g) and 3,4-TDHPP-Zn (0.075 mmol, 0.0604 g) instead of 3,4-TDHPP-Fe (0.075 mmol, 0.0597 g), respectively. The yields of FeTCP-M were over 80% based on 3,4-TDHPP-M (M = Co, Ni and Zn). ICP data: FeTCP-Fe, Fe (9.93%); FeTCP-Co, Fe (7.92%), Co (2.12%); FeTCP-Ni, Fe (8.00%), Ni (1.93%); FeTCP-Zn, Fe (8.34%), Zn (1.87%).

#### **Synthesis of InTCP-M (M = Fe, Co, Ni and Zn)**

The synthetic methods of InTCP-M (M = Fe, Co, Ni and Zn) were similar to that in the previous literature<sup>1</sup> with some modification. In(NO<sub>3</sub>)<sub>3</sub>·4.5H<sub>2</sub>O (0.075 mmol, 0.286 g), 3,4-TDHPP-Fe (0.075 mmol, 0.0597 g), water (1 mL) and *N, N*-

dimethylformamide (DMF, 3 mL) were mixed in a 23 mL teflon-lined stainless steel container, then heated to 140 °C for 4 days. After cooling to room temperature, brown powder was obtained after washing with methanol and drying, named InTCP-Fe (75%, yield based on 3,4-TDHPP-Fe). The synthetic methods of InTCP-M (M = Co, Ni and Zn) were similar to that of InTCP-Fe, except for 3,4-TDHPP-Co (0.075 mmol, 0.0599 g), 3,4-TDHPP-Ni (0.075 mmol, 0.0599 g) and 3,4-TDHPP-Zn (0.075 mmol, 0.0604 g) instead of 3,4-TDHPP-Fe (0.075 mmol, 0.0597 g), respectively. The yields of InTCP-M were over 70% based on 3,4-TDHPP-M (M = Co, Ni and Zn). ICP data: InTCP-Fe, In (16.54%), Fe (2.22%); InTCP-Co, In (17.03%), Co (1.86%); InTCP-Ni, In (17.05%), Ni (1.58%); InTCP-Zn, In (17.05%), Zn (1.43%).

#### Section 4 Powder X-ray Diffraction (PXRD)

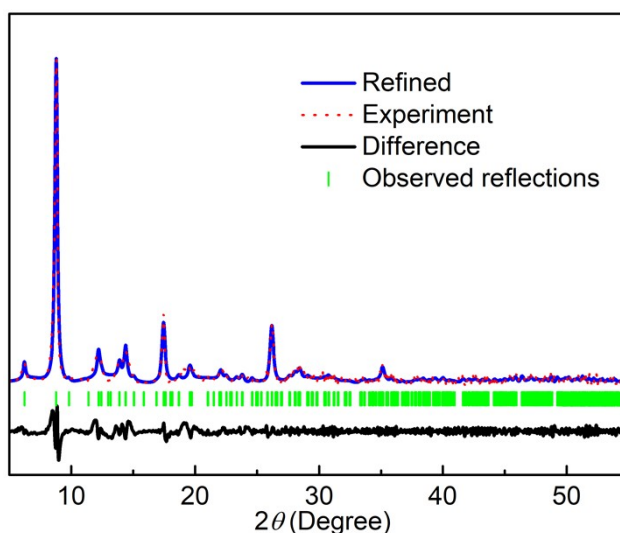

**Fig. S1** The experimentally obtained and the Rietveld-refined PXRD patterns of InTCP-Fe.

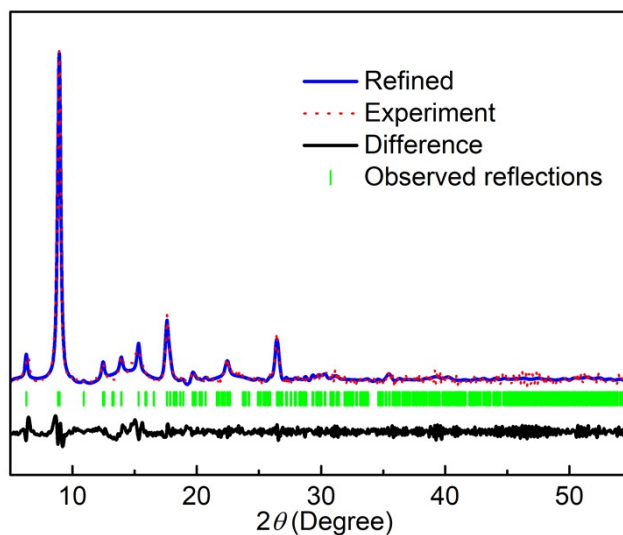

**Fig. S2** The experimentally obtained and the Rietveld-refined PXRd patterns of FeTCP-Fe.

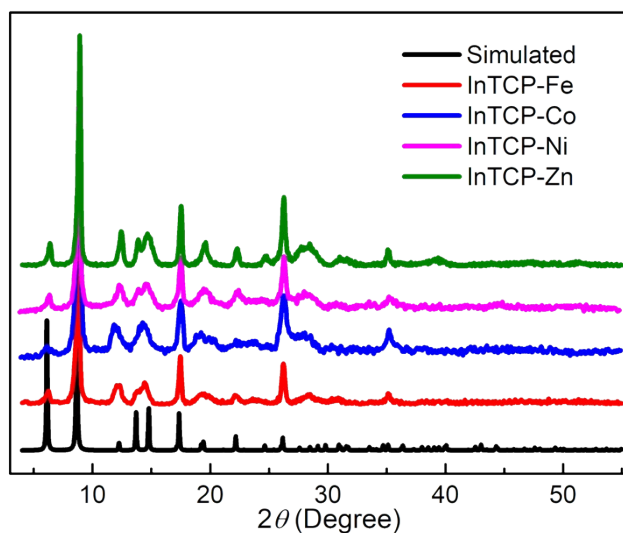

**Fig. S3** The PXRd patterns of InTCP-M (M = Fe, Co, Ni and Zn).

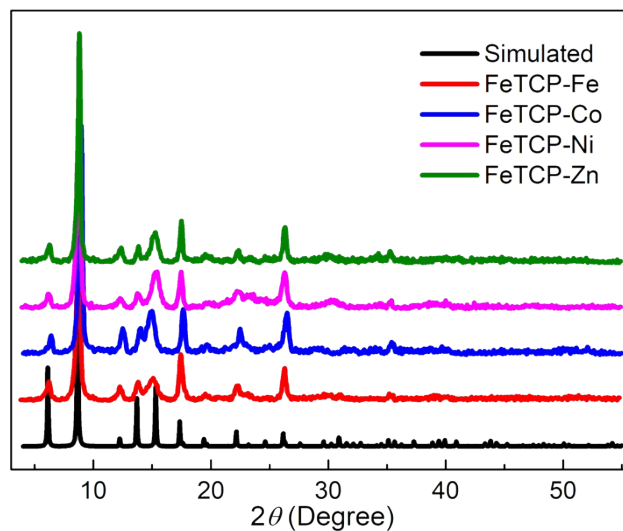

**Fig. S4** The PXRd patterns of FeTCP-M (M = Fe, Co, Ni and Zn).

## Section 5 The Morphology Characterization

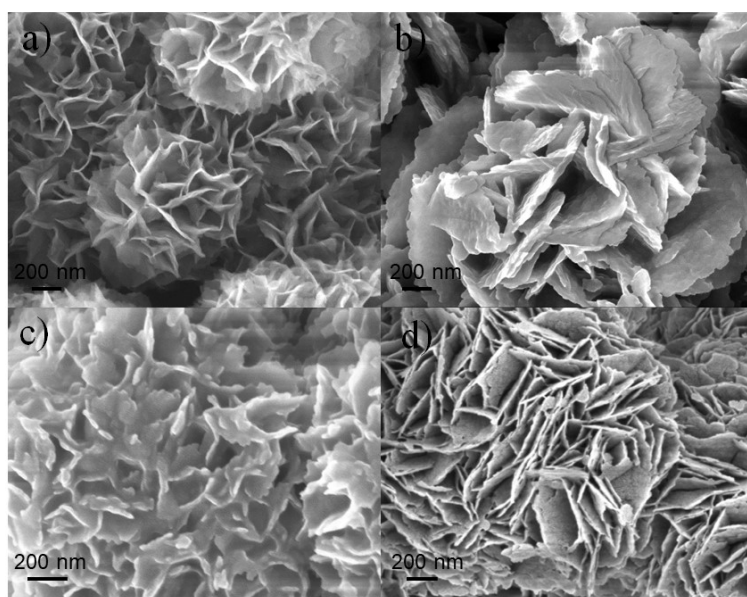

**Fig. S5** The SEM images of InTCP-M with the scale bar of 200 nm, (a) InTCP-Fe; (b) InTCP-Co; (c) InTCP-Ni and (d) InTCP-Zn.

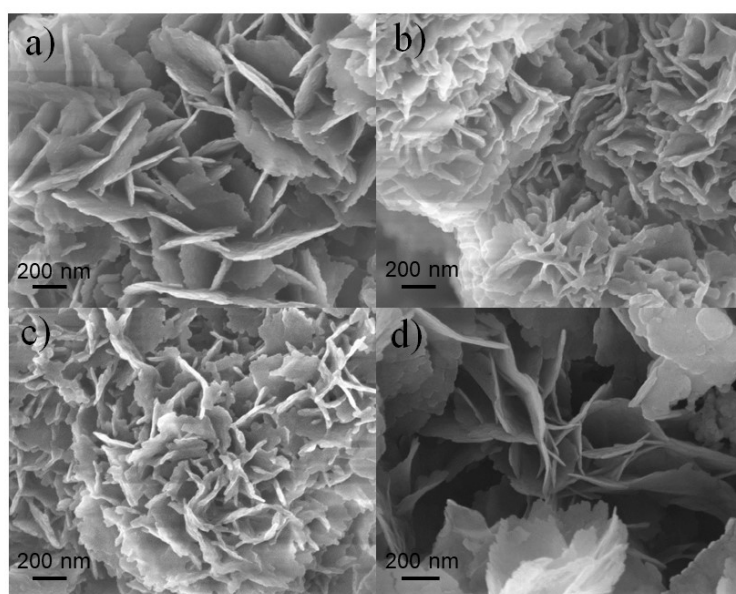

**Fig. S6** The SEM images of FeTCP-M with the scale bar of 200 nm, (a) FeTCP-Fe; (b) FeTCP-Co; (c) FeTCP-Ni and (d) FeTCP-Zn.

## Section 6 Gas Adsorption Measurements

Before the gas absorption measurement, InTCP-M and FeTCP-M (M = Fe, Co, Ni and Zn) were activated by soaking in CH<sub>3</sub>OH three days and CH<sub>3</sub>OH was renewed every 12 hours, respectively.

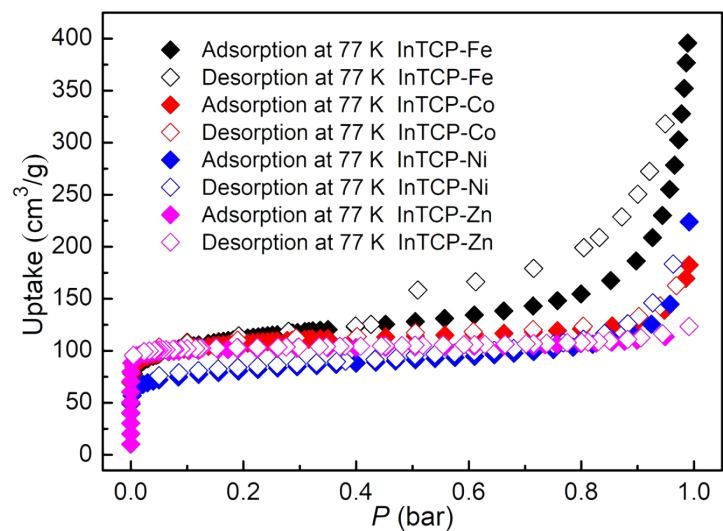

**Fig. S7**  $N_2$  adsorption/desorption isotherms of InTCP-M (M = Fe, Co, Ni and Zn) at 77 K.

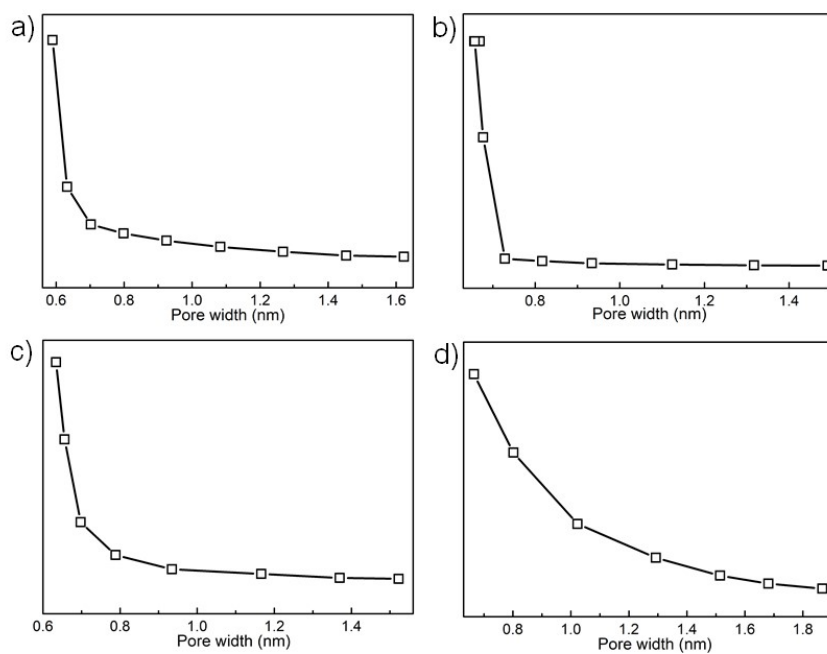

**Fig. S8** The pore size distribution of (a) InTCP-Fe; (b) InTCP-Co; (c) InTCP-Ni; (d) InTCP-Zn.



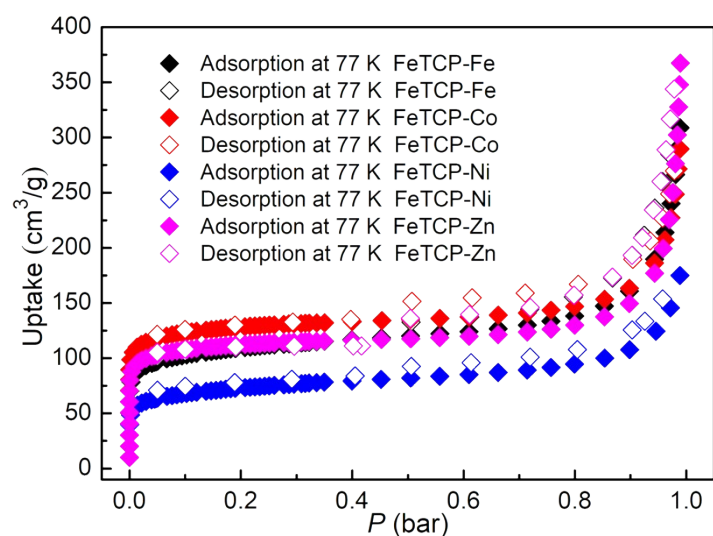

**Fig. S9**  $N_2$  adsorption/desorption isotherms of FeTCP-M (M = Fe, Co, Ni and Zn) at 77 K.

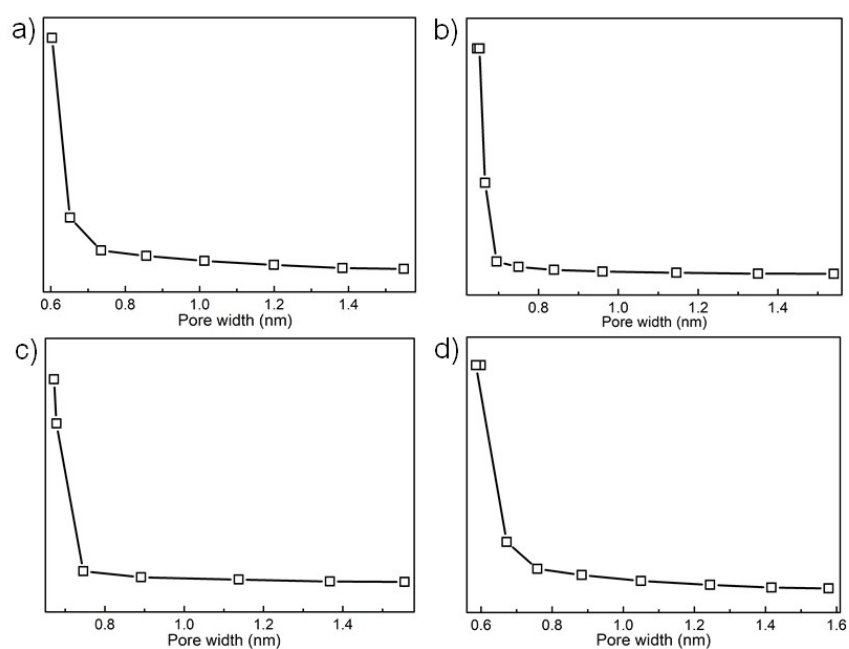

**Fig. S10** The pore size distribution of (a) FeTCP-Fe; (b) FeTCP-Co; (c) FeTCP-Ni; (d) FeTCP-Zn.

**Table S1.** The BET and Langmuir surface areas and pore size distribution of (In/Fe)TCP-M (M = Fe, Co, Ni and Zn)

|          | BET ( $m^2 g^{-1}$ ) | Langmuir ( $m^2 g^{-1}$ ) | Pore size (nm) |
|----------|----------------------|---------------------------|----------------|
| InTCP-Fe | 343.59               | 549.48                    | 0.5896         |
| InTCP-Co | 317.76               | 500.88                    | 0.6687         |
| InTCP-Ni | 249.68               | 387.28                    | 0.6338         |
| InTCP-Zn | 290.73               | 450.95                    | 0.6655         |

|          |        |        |        |
|----------|--------|--------|--------|
| FeTCP-Fe | 328.31 | 520.51 | 0.6031 |
| FeTCP-Co | 375.85 | 589.78 | 0.6500 |
| FeTCP-Ni | 223.22 | 356.11 | 0.6716 |
| FeTCP-Zn | 328.18 | 514.89 | 0.5900 |

### Section 7 Ultraviolet-Visible (UV-vis) Absorption Spectroscopy

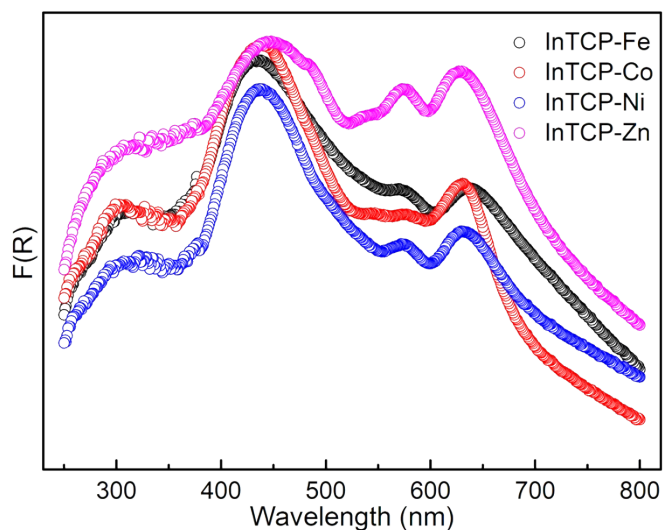

**Fig. S11** The UV-vis diffuse-reflectance spectra of InTCP-M (M = Fe, Co, Ni and Zn).

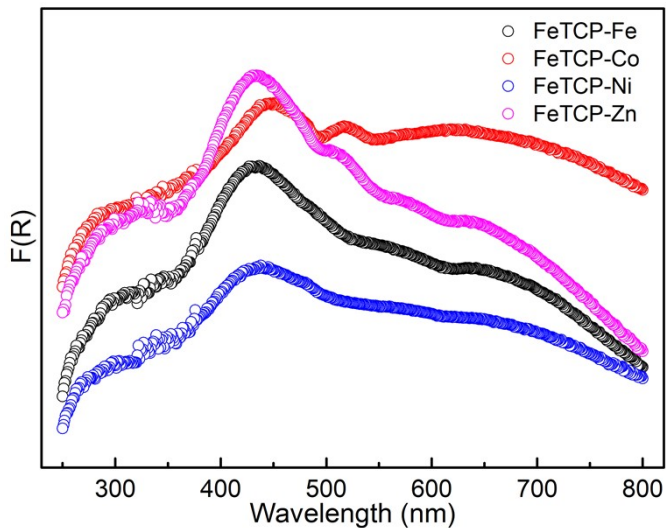

**Fig. S12** The UV-vis diffuse-reflectance spectra of FeTCP-M (M = Fe, Co, Ni and Zn).

### Section 8 Gas Sensing Characterization

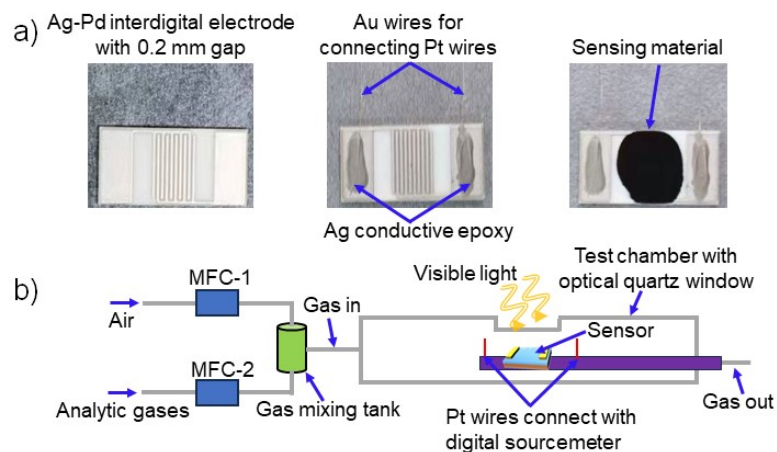

**Fig. S13** (a) Photographs of sensor devices in this work; (b) Schematic illustration of the custom-built gas-sensing instrument with a dynamic gas distribution system at room temperature and under visible light irradiation.

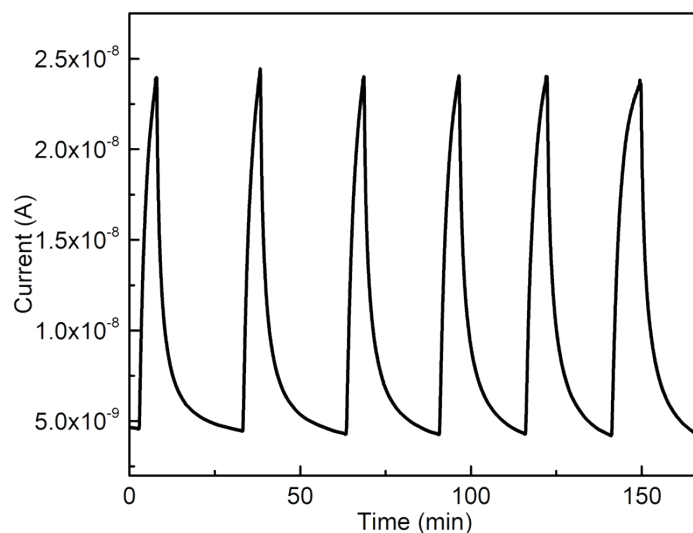

**Fig. S14** The dynamic response-recovery curve of InTCP-Fe to 10 ppm NO<sub>2</sub> in the six consecutive cycles with the visible light irradiation.

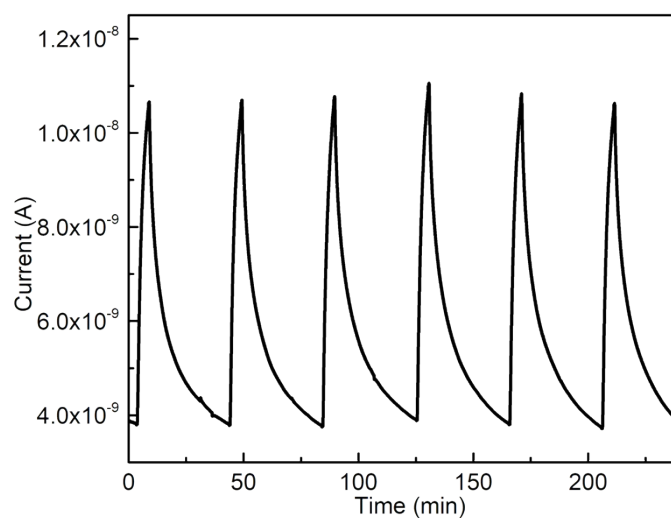

**Fig. S15** The dynamic response-recovery curve of InTCP-Ni to 10 ppm NO<sub>2</sub> in the six consecutive cycles with the visible light irradiation.

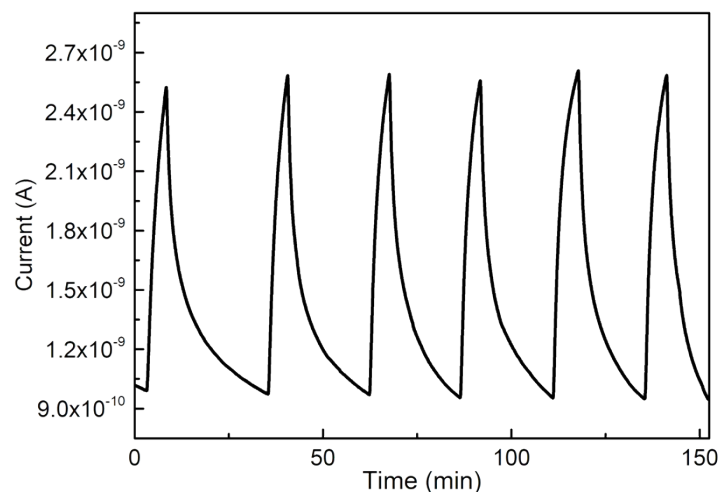

**Fig. S16** The dynamic response-recovery curve of InTCP-Zn to 10 ppm NO<sub>2</sub> in the six consecutive cycles with the visible light irradiation.

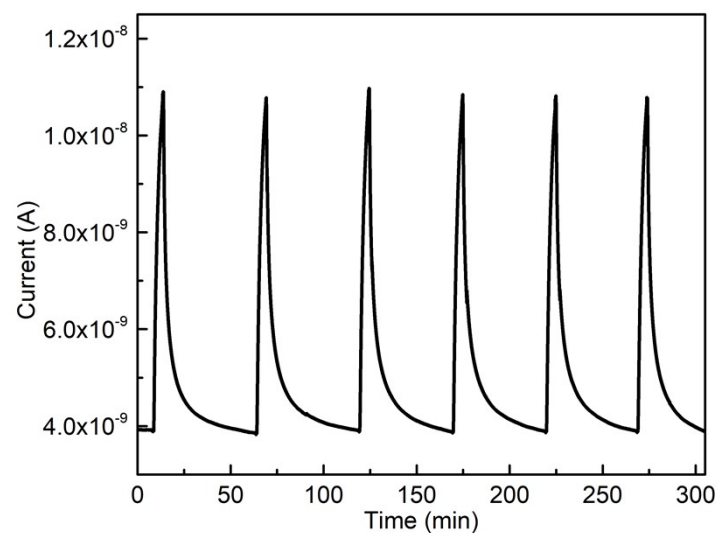

**Fig. S17** The dynamic response-recovery curve of FeTCP-Fe to 10 ppm NO<sub>2</sub> in the six consecutive cycles with the visible light irradiation.

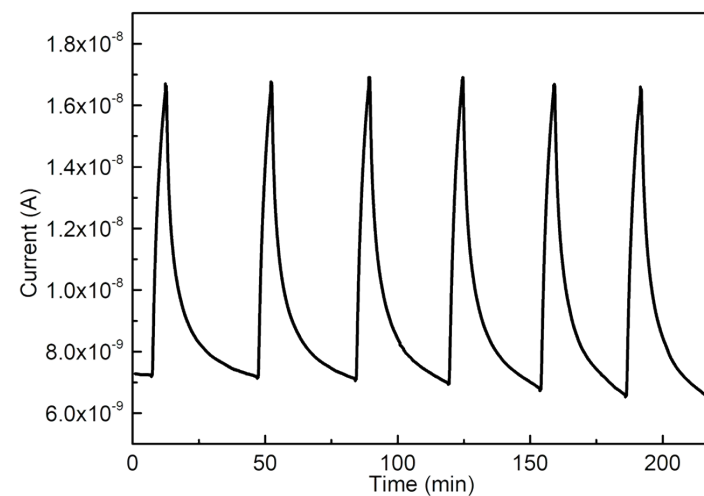

**Fig. S18** The dynamic response-recovery curve of FeTCP-Co to 10 ppm NO<sub>2</sub> in the six consecutive cycles with the visible light irradiation.

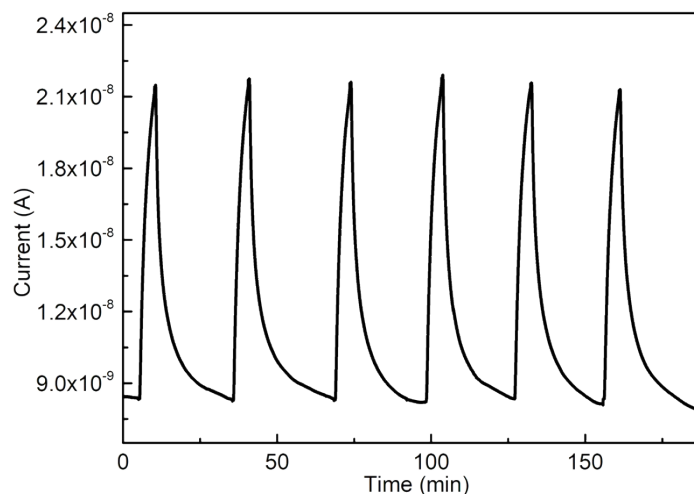

**Fig. S19** The dynamic response-recovery curve of FeTCP-Ni to 10 ppm NO<sub>2</sub> in the six consecutive cycles with the visible light irradiation.

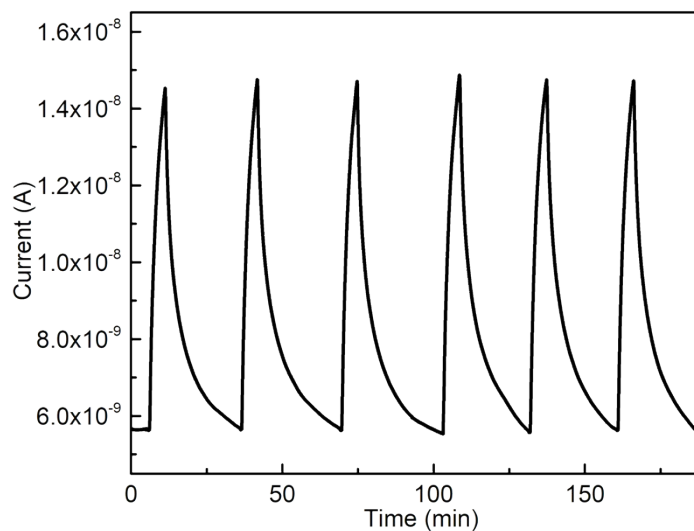

**Fig. S20** The dynamic response-recovery curve of FeTCP-Zn to 10 ppm NO<sub>2</sub> in the six consecutive cycles with the visible light irradiation.

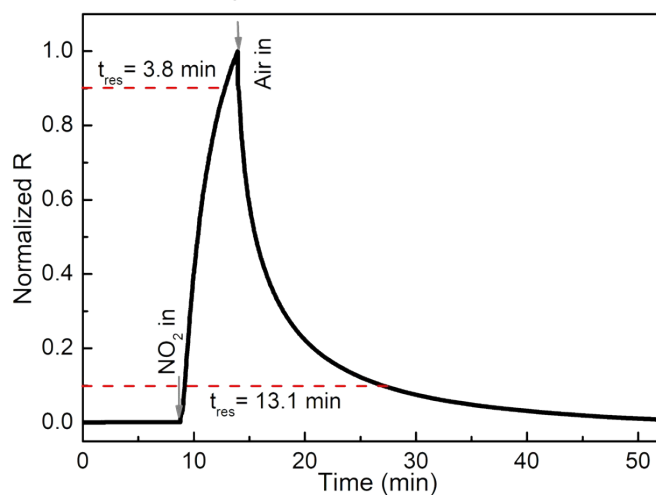

**Fig. S21** The normalized response-recovery time curve of InTCP-Co to 10 ppm NO<sub>2</sub> with the visible light irradiation.

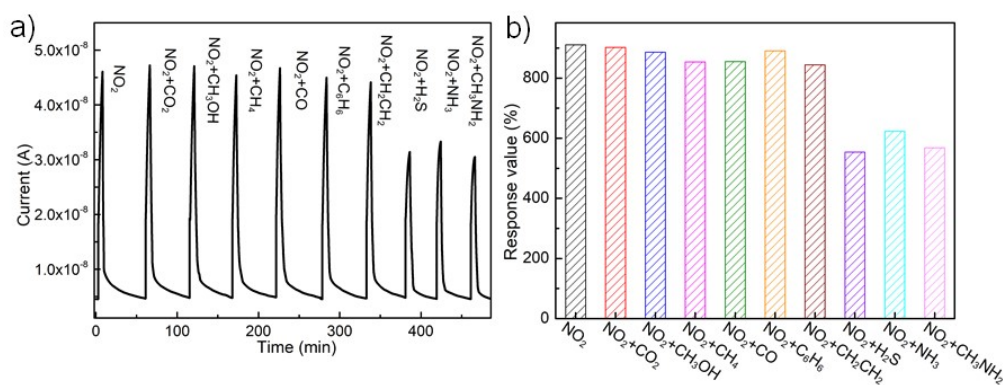

**Fig. S22** (a) The dynamic response-recovery curve of InTCP-Co to 10 ppm NO<sub>2</sub> and 10 ppm NO<sub>2</sub> mixed with 10 ppm other gases; (b) The response values of InTCP-Co to 10 ppm NO<sub>2</sub> and 10 ppm NO<sub>2</sub> mixed with 10 ppm other gases.

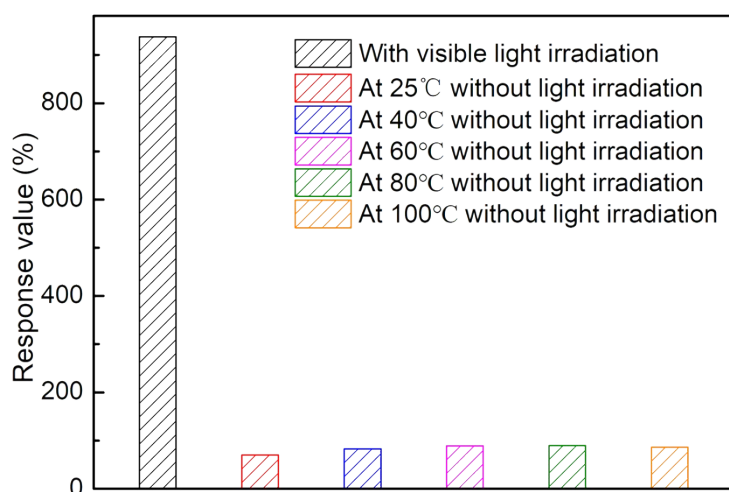

**Fig. S23** The response values of InTCP-Co to 10 ppm NO<sub>2</sub> under the visible light irradiation and at different temperature without light irradiation.

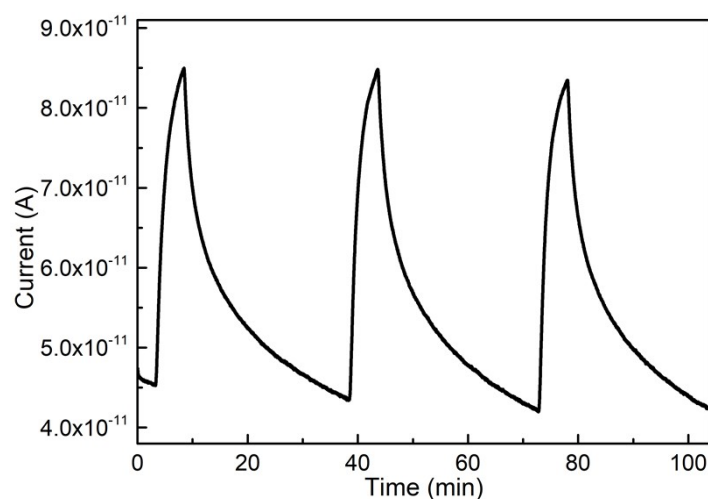

**Fig. S24** The dynamic response-recovery curve of InTCP-Co to 10 ppm NO<sub>2</sub> in three consecutive cycles at room temperature (25 °C) without light irradiation.

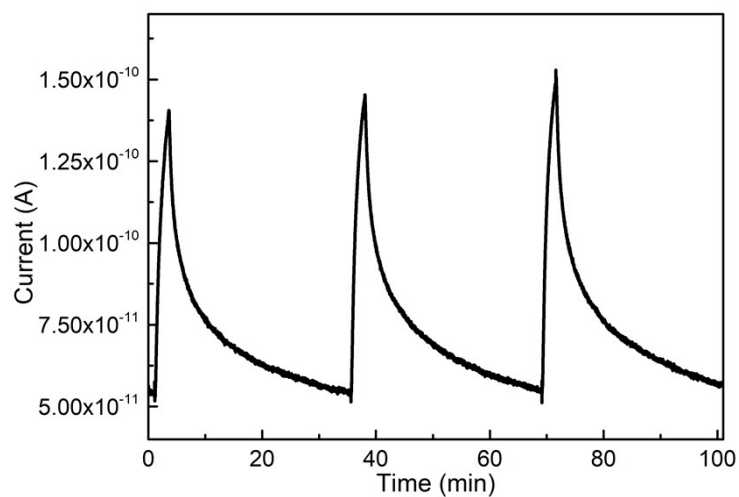

**Fig. S25** The dynamic response-recovery curve of InTCP-Co to 10 ppm NO<sub>2</sub> in three consecutive cycles at 40 °C without light irradiation.

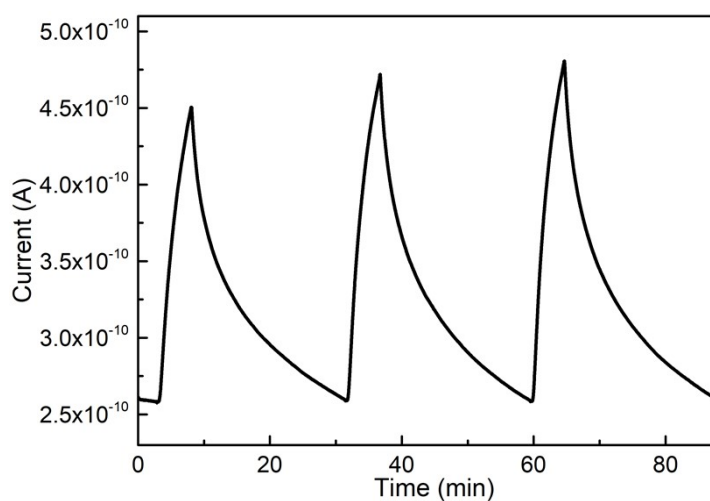

**Fig. S26** The dynamic response-recovery curve of InTCP-Co to 10 ppm NO<sub>2</sub> in three consecutive cycles at 60 °C without light irradiation.

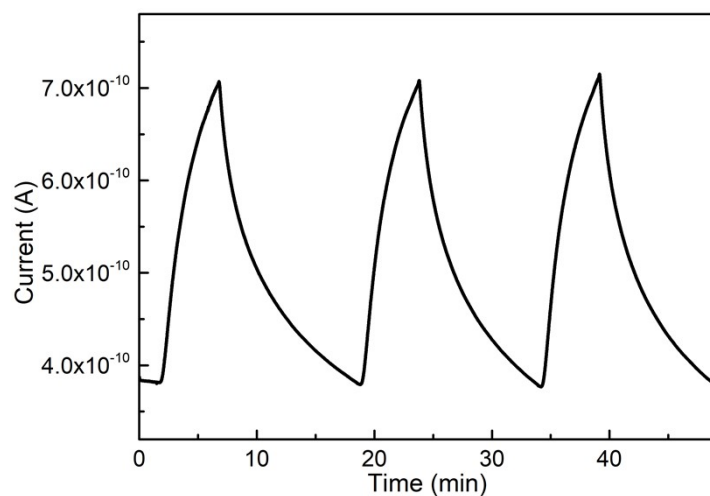

**Fig. S27** The dynamic response-recovery curve of InTCP-Co to 10 ppm NO<sub>2</sub> in three consecutive cycles at 80 °C without light irradiation.

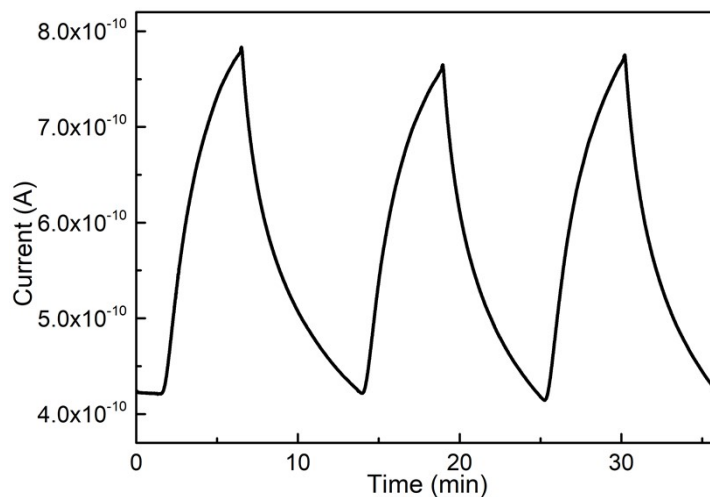

**Fig. S28** The dynamic response-recovery curve of InTCP-Co to 10 ppm NO<sub>2</sub> in three consecutive cycles at 100 °C without light irradiation.

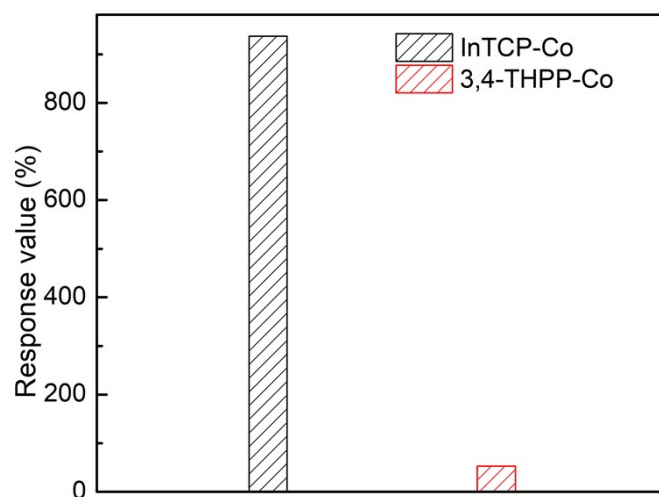

**Fig. S29** The response values of InTCP-Co and 3,4-TDHP-Co to 10 ppm NO<sub>2</sub> under the visible light irradiation.

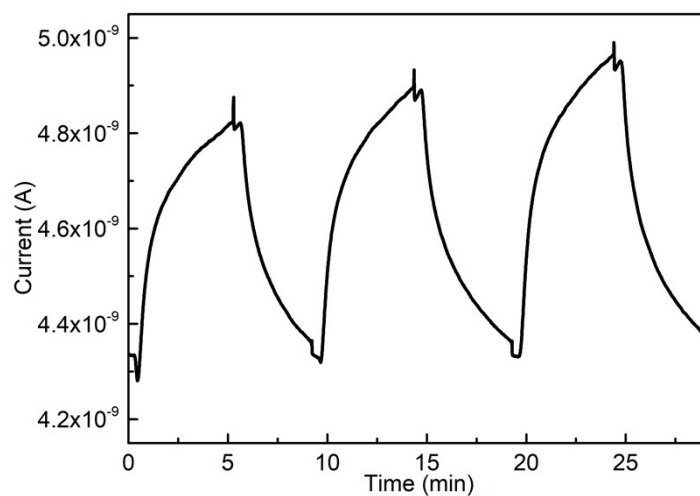

**Fig. S30** The dynamic response-recovery curve of 3,4-TDHP-Co to 10 ppm NO<sub>2</sub> in three consecutive cycles with the visible light irradiation.



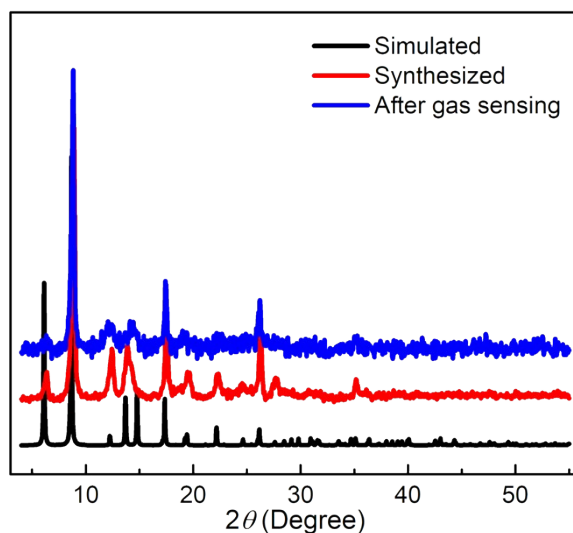

**Fig. S31** The PXRD patterns of InTCP-Co after the gas sensing tests.

**Table S2** Gas sensing properties of reported materials for the NO<sub>2</sub> under room temperature and visible-light irradiation

| Material                                                        | Concentration | Response              | T <sub>res.</sub> /T <sub>rec.</sub> | Experimental detection limit | Long-term stability              | Ref. |
|-----------------------------------------------------------------|---------------|-----------------------|--------------------------------------|------------------------------|----------------------------------|------|
| Zn-TDCOF-12                                                     | 100 ppm       | 554                   | 8.1 min/10.6 min                     | 40 ppb                       | 35 days                          | 4    |
| FIR-120                                                         | 10 ppm        | 2040%                 | 2.48 min/2.60 min                    | 40 ppb                       | 70 days                          | 5    |
| HOF-1                                                           | 100 ppm       | 1.7×10 <sup>5</sup> % | 2.5 min/0.6 min                      | 20 ppb                       | 50 days                          | 6    |
| HOF-2                                                           | 100 ppm       | 4.0×10 <sup>4</sup> % | 3.8 min/2.0 min                      | 40 ppb                       | -                                | 6    |
| HOF-3                                                           | 100 ppm       | 4.5×10 <sup>3</sup> % | 5.7 min/5.8 min                      | 40 ppb                       | -                                | 6    |
| HPS<br>WO <sub>3</sub> /CuWO <sub>4</sub>                       | 1 ppm         | 82                    | 93 s/28 s                            | 50 ppb                       | 30 days                          | 7    |
| WO <sub>3</sub>                                                 | 160 ppb       | 2.9                   | 14.9 min/18.3 min                    | -                            | -                                | 8    |
| dye sensitized<br>a-ZnO                                         | 1.25 ppm      | 1.25                  | long/long                            | 1.25 ppm                     | -                                | 9    |
| 3D IO In <sub>2</sub> O <sub>3</sub> -<br>ZnO HCMs (S3)         | 5 ppm         | 54.3                  | 586 s/188 s                          | 250 ppb                      | 30 days                          | 10   |
| Black NiO                                                       | 372 ppb       | 31.04%                | 13.2 min/29.1 min                    | 57 ppb                       | -                                | 11   |
| r-GO-ZnO                                                        | 100 ppb       | 4.66                  | 1.5 min/2.5 min                      | 50 ppb                       | 30 days                          | 12   |
| PI/SnO <sub>2</sub>                                             | 0.5 ppm       | 131.6                 | 6 min/4 min                          | 250 ppb                      | -                                | 13   |
| Rb <sub>2</sub> CO <sub>3</sub> /In <sub>2</sub> O <sub>3</sub> | 250 ppb       | 60                    | 2.5 min/~45 min                      | 150 ppb                      | 45 days                          | 14   |
| SnO <sub>2</sub> @SnS <sub>2</sub>                              | 0.2 ppm       | 5.3                   | 950 s/1160 s                         | 0.2 ppm                      | 180 days                         | 15   |
| ZnO/g-C <sub>3</sub> N <sub>4</sub> -<br>10wt%                  | 7 ppm         | 44.8                  | 142 s/190 s                          | 100 ppb                      | -                                | 16   |
| ZnO/Pd                                                          | 100 ppb       | ~160%                 | 25 s/29 s                            | 5 ppb                        | 90 days                          | 17   |
| In <sub>2</sub> O <sub>3</sub>                                  | 500 ppb       | 5.52                  | ~500 s/1100 s                        | 10 ppb                       | 90 days                          | 18   |
| ReS <sub>2</sub><br>nanosheets                                  | 500 ppb       | 9.07                  | 55 s/180 s                           | 50ppb                        | 40 days,<br>(about 12%<br>decay) | 19   |
| SnS <sub>2</sub> NFs                                            | 5 ppm         | 14.28                 | 400 s/1100 s                         | 400 ppb                      | 90 days                          | 20   |

|                                                                                                       |         |       |                  |         |                              |           |
|-------------------------------------------------------------------------------------------------------|---------|-------|------------------|---------|------------------------------|-----------|
| ZIC                                                                                                   | 1 ppm   | 7.2   | 36 s/80 s        | 50 ppb  | 40 days                      | 21        |
| Fe <sub>2</sub> O <sub>3</sub> -Cu <sub>3</sub> (HHT P) <sub>2</sub> -NFs                             | 5 ppm   | 63.5% | ~27 min/~100 min | 200 ppb | -                            | 22        |
| 5Au-SnO <sub>2</sub>                                                                                  | 5 ppm   | 180   | 500 s/223 s      | 125 ppb | 30 days                      | 23        |
| Ti <sub>3</sub> C <sub>2</sub> Tx/WS <sub>2</sub>                                                     | 2 ppm   | 55.6% | 56 s/53 s        | 10 ppb  | 90 days                      | 24        |
| S-doped SnO <sub>2</sub> NPs                                                                          | 5 ppm   | 418   | 170 s/64 s       | 200 ppb | 90 days<br>(about 16% decay) | 25        |
| Au/WS <sub>2</sub>                                                                                    | 1 ppm   | ~4.1  | ~50 s/~83 s      | 20 ppb  | 30 days                      | 26        |
| Bi <sub>2</sub> S <sub>3</sub> /SnS <sub>2</sub>                                                      | 500 ppb | 14    | 38 s/80 s        | 50 ppb  | 50 days                      | 27        |
| [ <i>n</i> -pentylamini um] <sub>2</sub> [ethylammonium] <sub>2</sub> Pb <sub>3</sub> I <sub>10</sub> | 5 ppm   | 34%   | 9 s/9.6 s        | 1 ppm   | 3 days                       | 28        |
| InTCP-Co                                                                                              | 10 ppm  | 937%  | 3.8 min/13.1 min | 40 ppb  | 90 days                      | This work |

### Section 9 X-ray Photoelectron Spectroscopy (XPS)

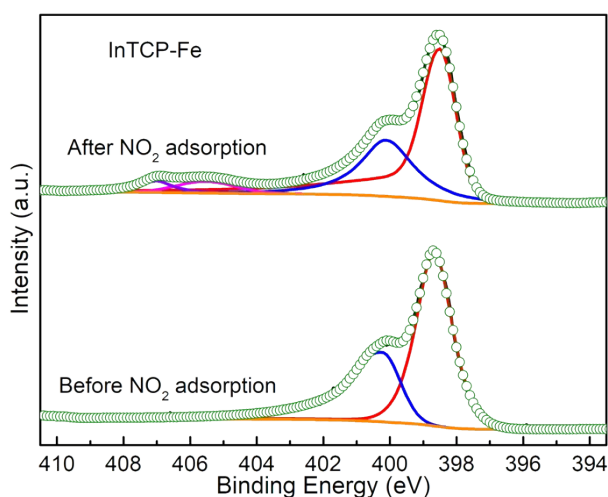

**Fig. S32** The N1s XPS spectra of InTCP-Fe before and after NO<sub>2</sub> adsorption.

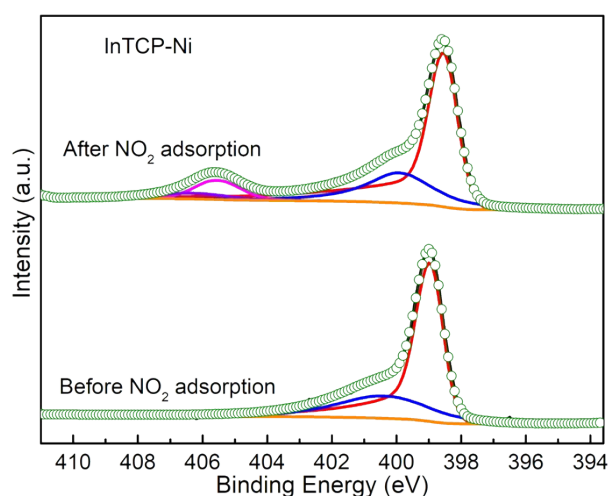

**Fig. S33** The N1s XPS spectra of InTCP-Ni before and after NO<sub>2</sub> adsorption.

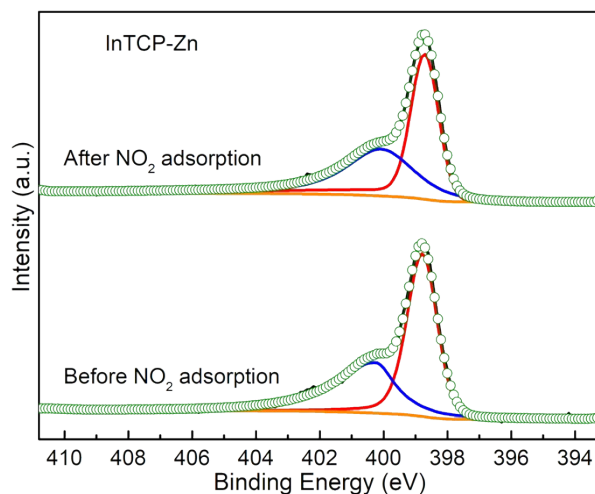

**Fig. S34** The N1s XPS spectra of InTCP-Zn before and after NO<sub>2</sub> adsorption.

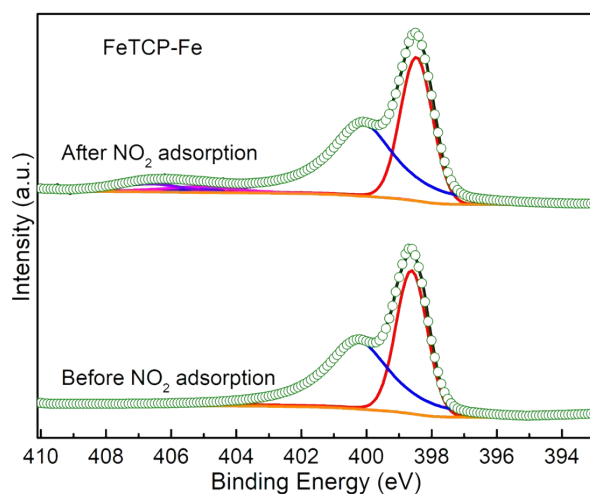

**Fig. S35** The N1s XPS spectra of FeTCP-Fe before and after NO<sub>2</sub> adsorption.

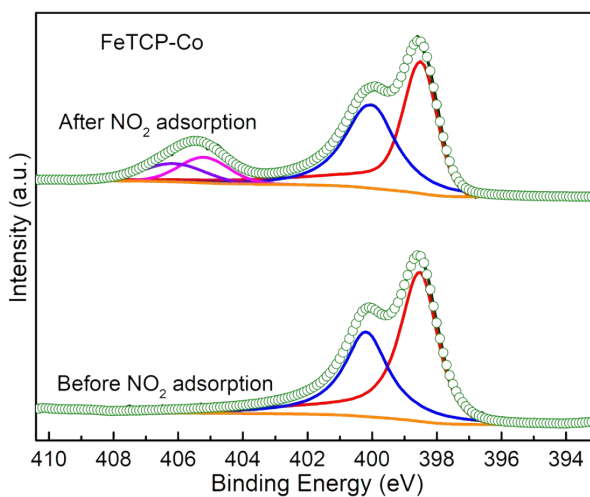

**Fig. S36** The N1s XPS spectra of FeTCP-Co before and after NO<sub>2</sub> adsorption.

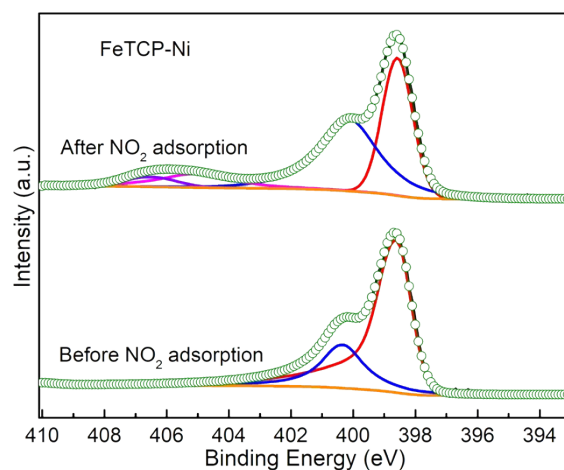

**Fig. S37** The N1s XPS spectra of FeTCP-Ni before and after NO<sub>2</sub> adsorption.

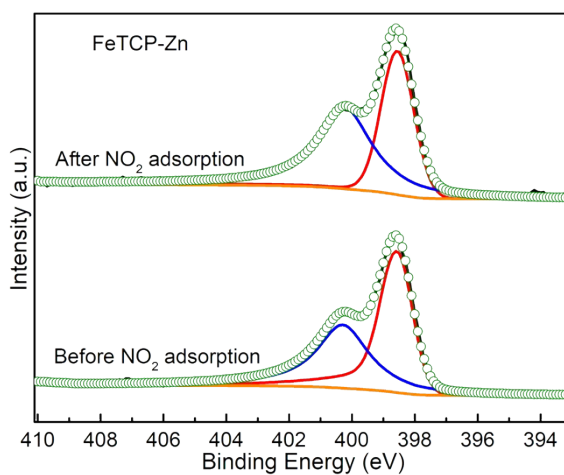

**Fig. S38** The N1s XPS spectra of FeTCP-Zn before and after NO<sub>2</sub> adsorption.

### Section 10 Density Functional Theory (DFT) Calculations

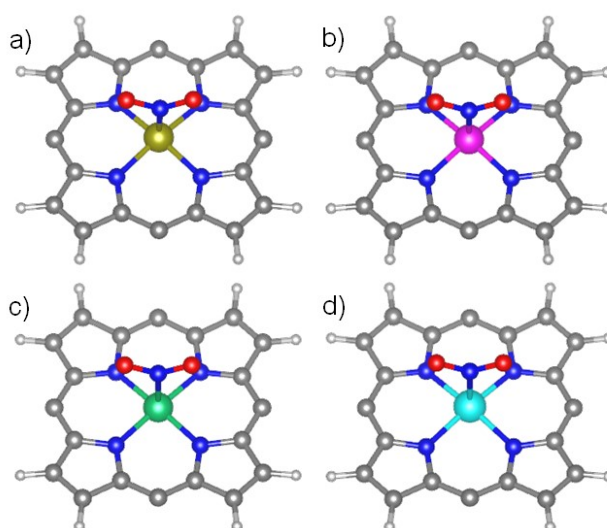

**Fig. S39** The optimal NO<sub>2</sub> adsorption configurations on (a) FeTCP-Fe; (b) FeTCP-Co; (c) FeTCP-Ni and (d) FeTCP-Zn; The other parts in the structures of FeTCP-M (M = Fe, Co, Ni and Zn) have been omitted for clarity in the (a)~(d).

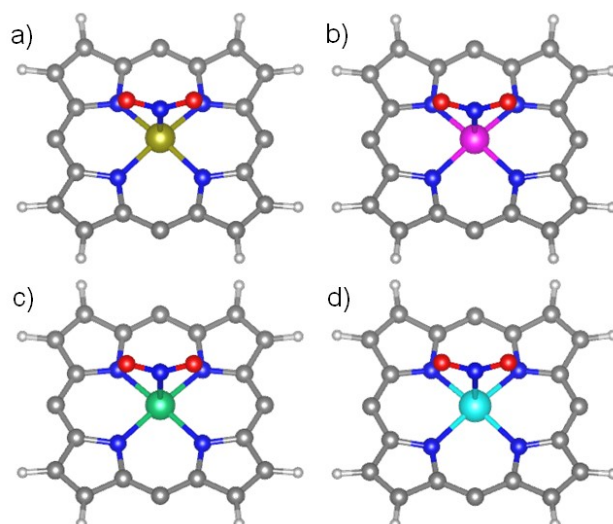

**Fig. S40** The optimal  $\text{NO}_2$  adsorption configurations on (a) InTCP-Fe; (b) InTCP-Co; (c) InTCP-Ni and (d) InTCP-Zn; The other parts in the structures of InTCP-M (M = Fe, Co, Ni and Zn) have been omitted for clarity in the (a)~(d).

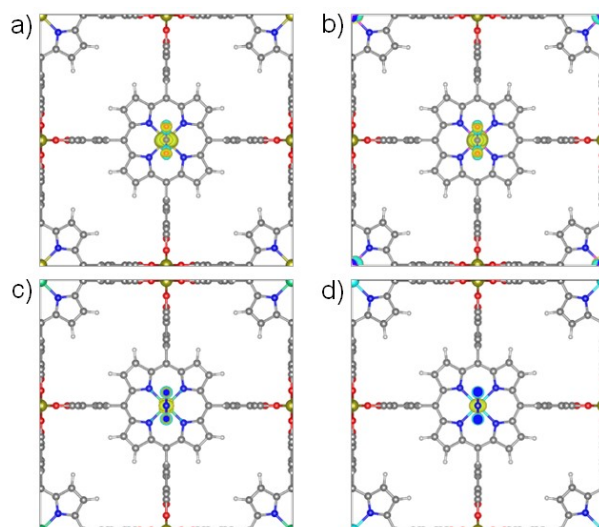

**Fig. S41** The charge difference density maps of  $\text{NO}_2$  adsorbed on (a) FeTCP-Fe; (b) FeTCP-Co; (c) FeTCP-Ni and (d) FeTCP-Zn.

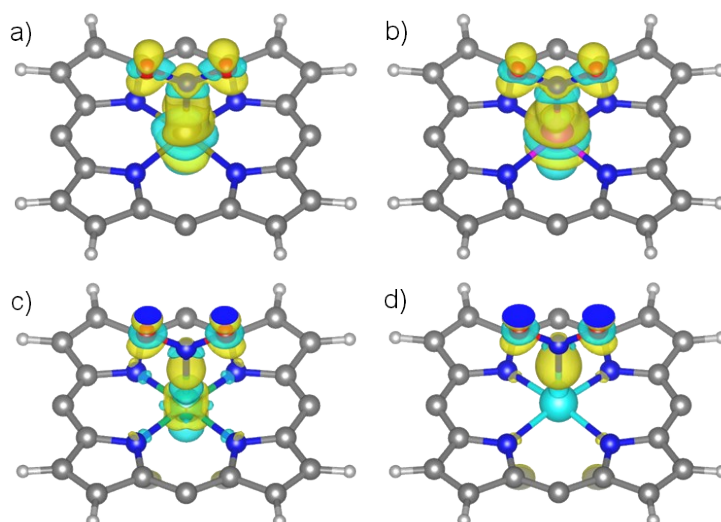

**Fig. S42** The charge difference density maps of NO<sub>2</sub> adsorbed on (a) FeTCP-Fe; (b) FeTCP-Co; (c) FeTCP-Ni and (d) FeTCP-Zn; The other parts in the structures of FeTCP-M (M = Fe, Co, Ni and Zn) have been omitted for clarity in the (a)~(d).

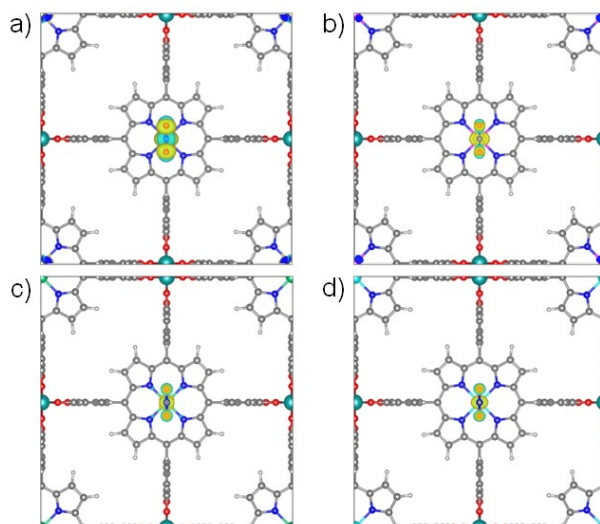

**Fig. S43** The charge difference density maps of NO<sub>2</sub> adsorbed on (a) InTCP-Fe; (b) InTCP-Co; (c) InTCP-Ni and (d) InTCP-Zn.

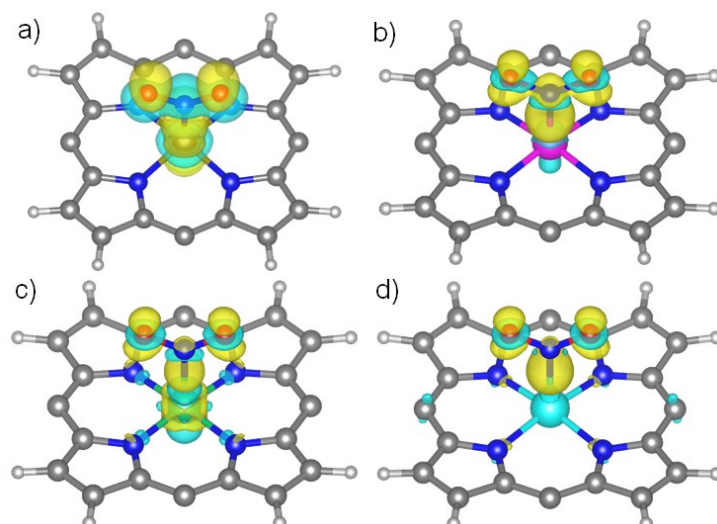

**Fig. S44** The charge difference density maps of  $\text{NO}_2$  adsorbed on (a) InTCP-Fe; (b) InTCP-Co; (c) InTCP-Ni and (d) InTCP-Zn; The other parts in the structures of InTCP-M (M = Fe, Co, Ni and Zn) have been omitted for clarity in the (a)~(d).

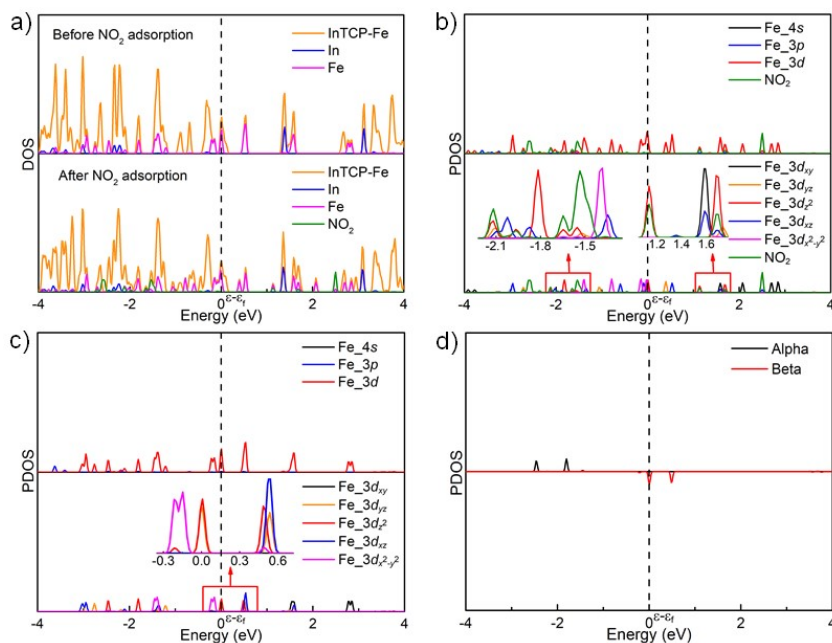

**Fig. S45** (a) The TDOS and PDOS of InTCP-Fe before and after  $\text{NO}_2$  adsorption; (b) The PDOS of  $\text{NO}_2$  and Fe-4s, Fe-3p, Fe-3d orbitals of InTCP-Fe after  $\text{NO}_2$  adsorption; (c) The PDOS of Fe-4s, Fe-3p and Fe-3d orbitals of InTCP-Fe before  $\text{NO}_2$  adsorption; (d) The PDOS of electron spin states in Fe- $3d_{z^2}$  orbital of InTCP-Fe.

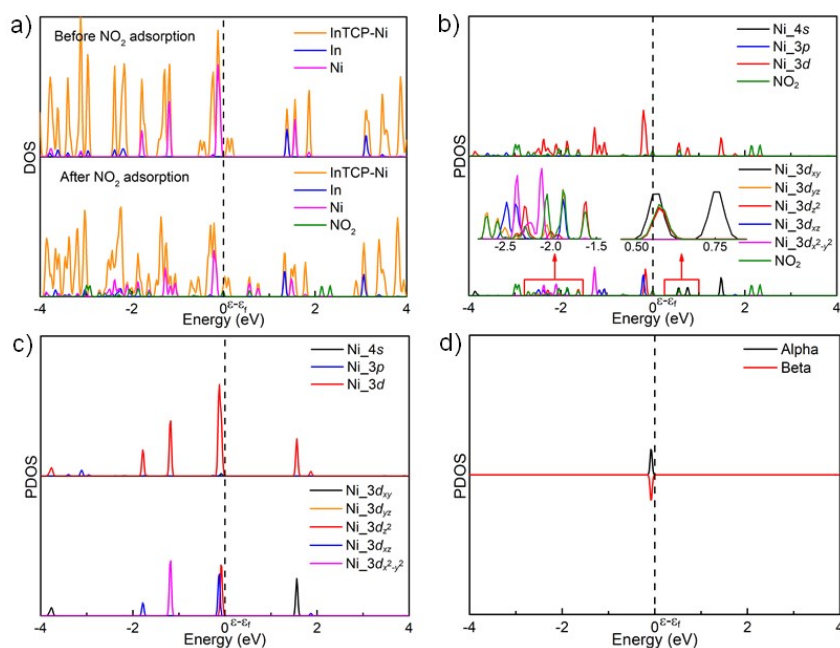

**Fig. S46** (a) The TDOS and PDOS of InTCP-Ni before and after NO<sub>2</sub> adsorption; (b) The PDOS of NO<sub>2</sub> and Ni-4s, Ni-3p, Ni-3d orbitals of InTCP-Ni after NO<sub>2</sub> adsorption; (c) The PDOS of Ni-4s, Ni-3p and Ni-3d orbitals of InTCP-Ni before NO<sub>2</sub> adsorption; (d) The PDOS of electron spin states in Ni-3d<sub>z<sup>2</sup></sub> orbital of InTCP-Ni.

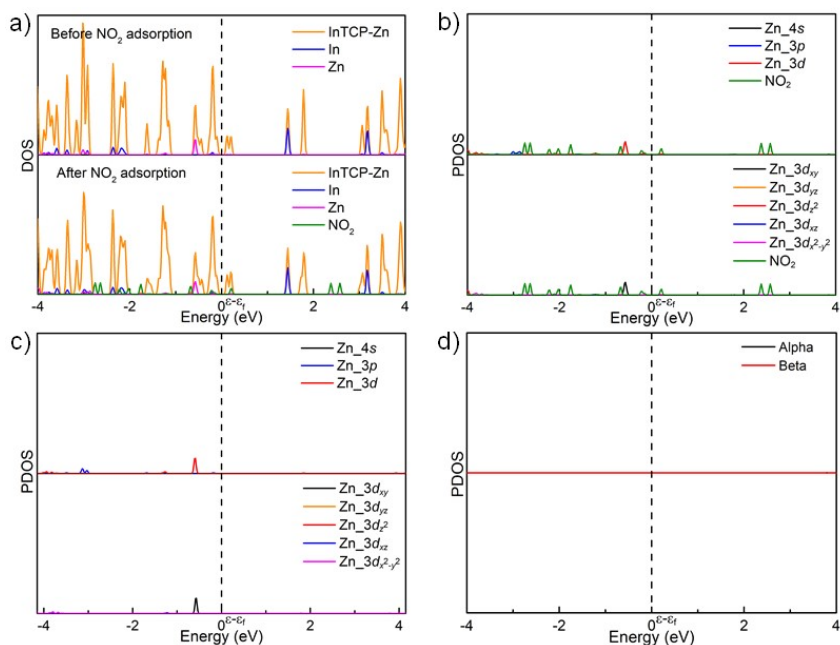

**Fig. S47** (a) The TDOS and PDOS of InTCP-Zn before and after NO<sub>2</sub> adsorption; (b) The PDOS of NO<sub>2</sub> and Zn-4s, Zn-3p, Zn-3d orbitals of InTCP-Zn after NO<sub>2</sub> adsorption; (c) The PDOS of Zn-4s, Zn-3p and Zn-3d orbitals of InTCP-Zn before NO<sub>2</sub> adsorption; (d) The PDOS of electron spin states in Zn-3d<sub>z<sup>2</sup></sub> orbital of InTCP-Zn.



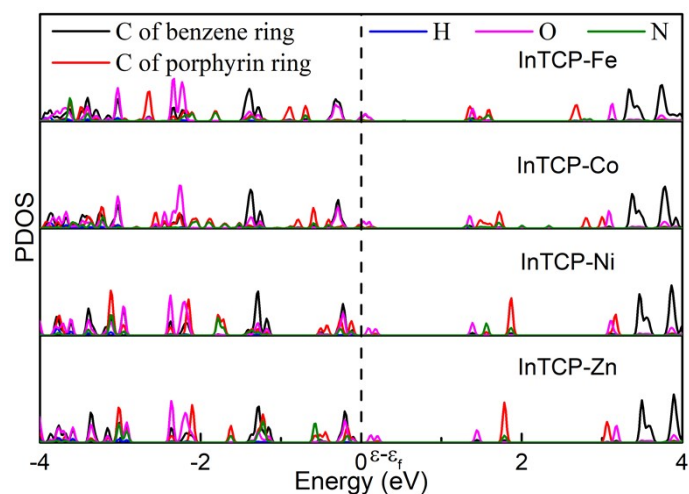

**Fig. S48** The PDOS of C, H, O and N of InTCP-M before NO<sub>2</sub> adsorption (M = Fe, Co, Ni and Zn).

**Table S3.** The integrated crystal orbital overlap population (ICOOP) values between NO<sub>2</sub> and *beta* state of electron spin in M-3d<sub>z<sup>2</sup></sub> of InTCP-M and FeTCP-M (M = Fe, Co, Ni and Zn)

|          | ICOOP value |          | ICOOP value |
|----------|-------------|----------|-------------|
| InTCP-Fe | 0.04833     | FeTCP-Fe | 0.05918     |
| InTCP-Co | 0.05263     | FeTCP-Co | 0.05072     |
| InTCP-Ni | 0.03688     | FeTCP-Ni | 0.03742     |
| InTCP-Zn | 0.00919     | FeTCP-Zn | 0.00995     |

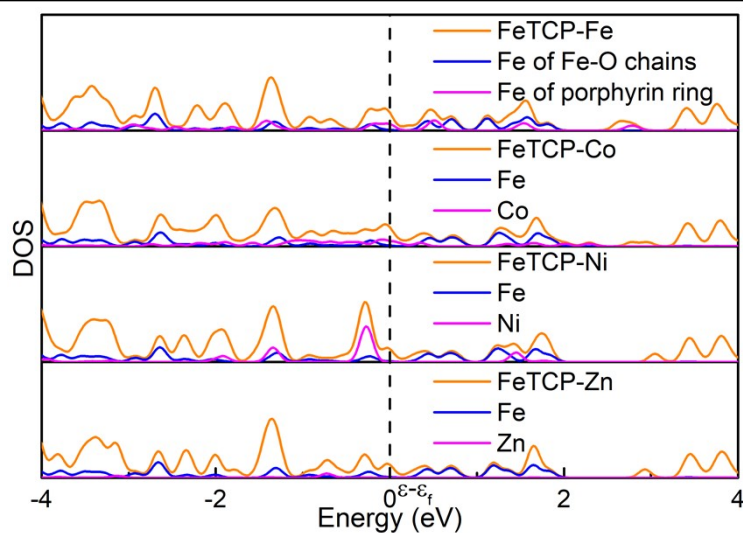

**Fig. S49** The TDOS of FeTCP-M and PDOS of Fe and M in porphyrin ring before NO<sub>2</sub> adsorption (M = Fe, Co, Ni and Zn).

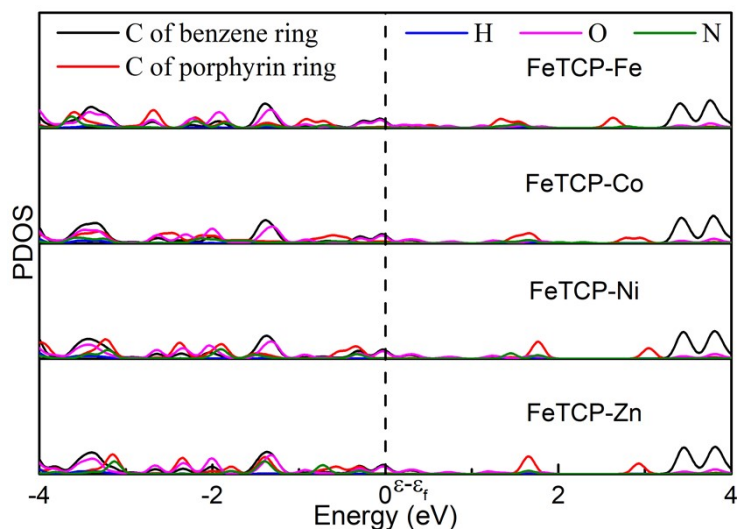

**Fig. S50** The PDOS of C, H, O and N of FeTCP-M before NO<sub>2</sub> adsorption (M = Fe, Co, Ni and Zn).

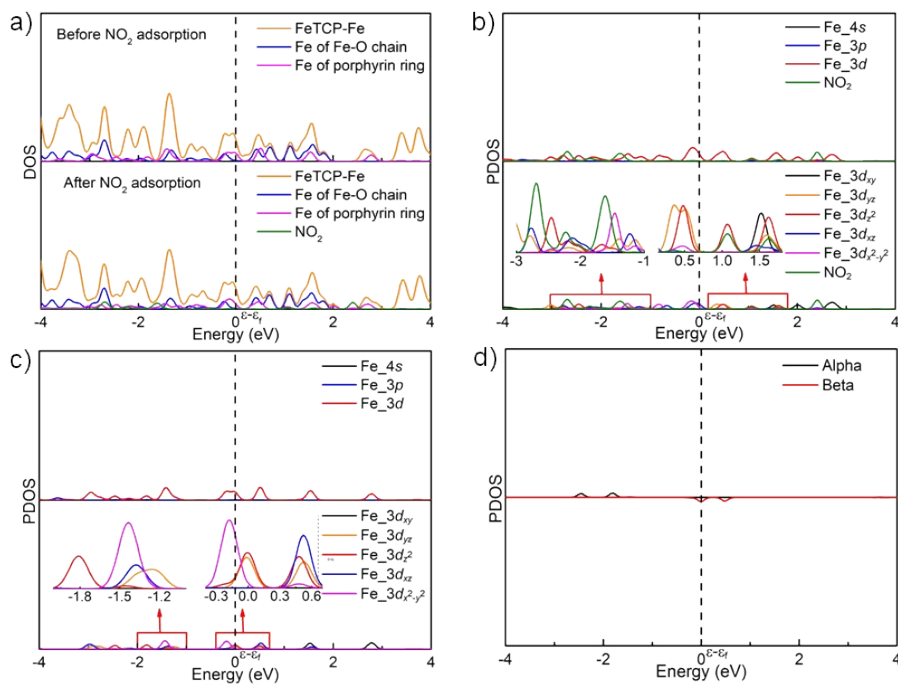

**Fig. S51** (a) The TDOS and PDOS of FeTCP-Fe before and after NO<sub>2</sub> adsorption; (b) The PDOS of NO<sub>2</sub> and Fe-4s, Fe-3p, Fe-3d orbitals of Fe in porphyrin ring of FeTCP-Fe after NO<sub>2</sub> adsorption; (c) The PDOS of Fe-4s, Fe-3p and Fe-3d orbitals of Fe in porphyrin ring of FeTCP-Fe before NO<sub>2</sub> adsorption; (d) The PDOS of electron spin states in Fe-3d<sub>z</sub><sup>2</sup> orbital of Fe in porphyrin ring of FeTCP-Fe.

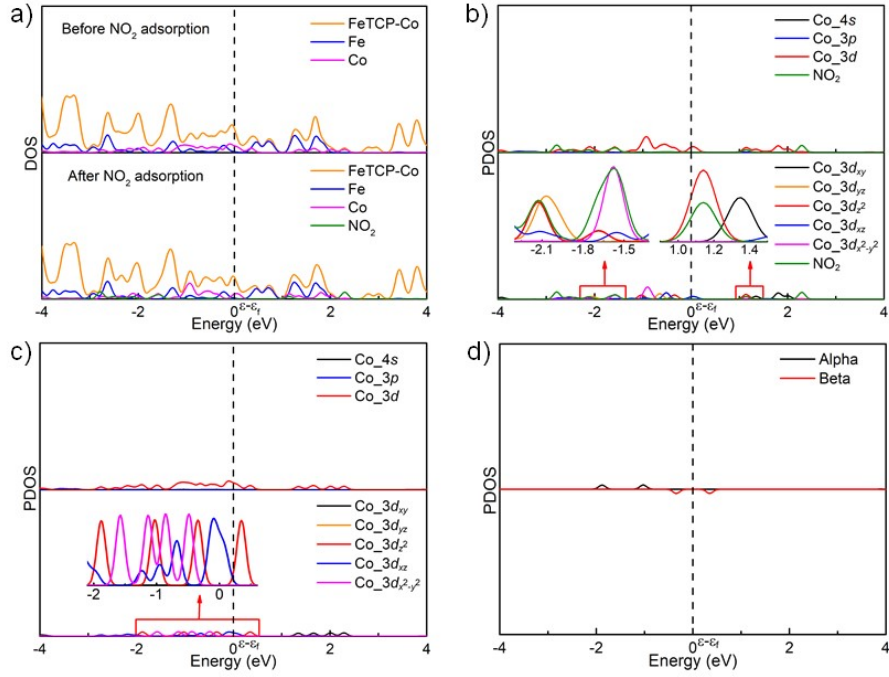

**Fig. S52** (a) The TDOS and PDOS of FeTCP-Co before and after NO<sub>2</sub> adsorption; (b) The PDOS of NO<sub>2</sub> and Co-4s, Co-3p, Co-3d orbitals of FeTCP-Co after NO<sub>2</sub> adsorption; (c) The PDOS of Co-4s, Co-3p and Co-3d orbitals of FeTCP-Co before NO<sub>2</sub> adsorption; (d) The PDOS of electron spin states in Co-3d<sub>z<sup>2</sup></sub> orbital of FeTCP-Co.

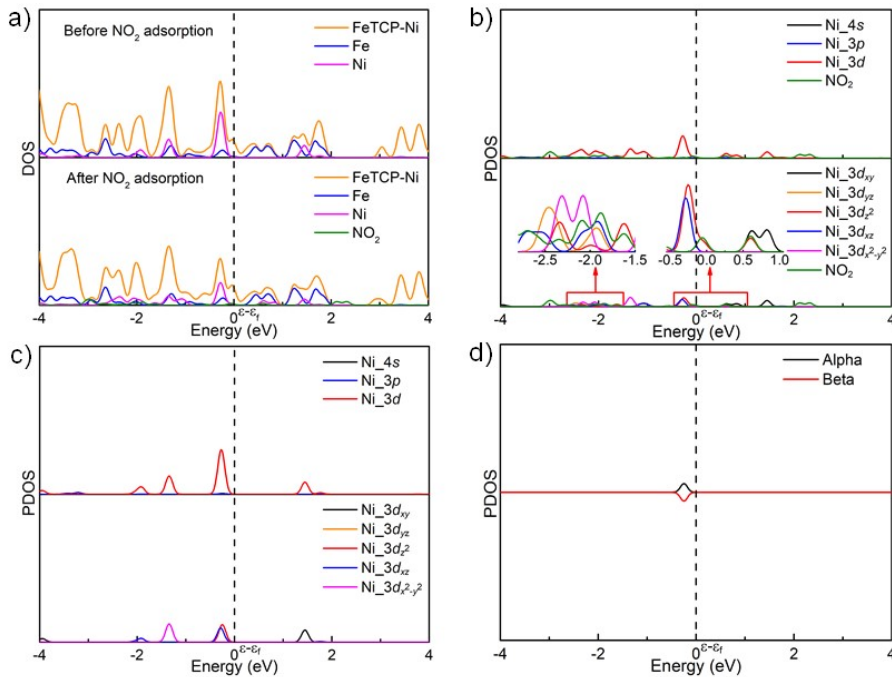

**Fig. S53** (a) The TDOS and PDOS of FeTCP-Ni before and after NO<sub>2</sub> adsorption; (b) The PDOS of NO<sub>2</sub> and Ni-4s, Ni-3p, Ni-3d orbitals of FeTCP-Ni after NO<sub>2</sub> adsorption; (c) The PDOS of Ni-4s, Ni-3p and Ni-3d orbitals of FeTCP-Ni before NO<sub>2</sub> adsorption; (d) The PDOS of electron spin states in Ni-3d<sub>z<sup>2</sup></sub> orbital of FeTCP-Ni.

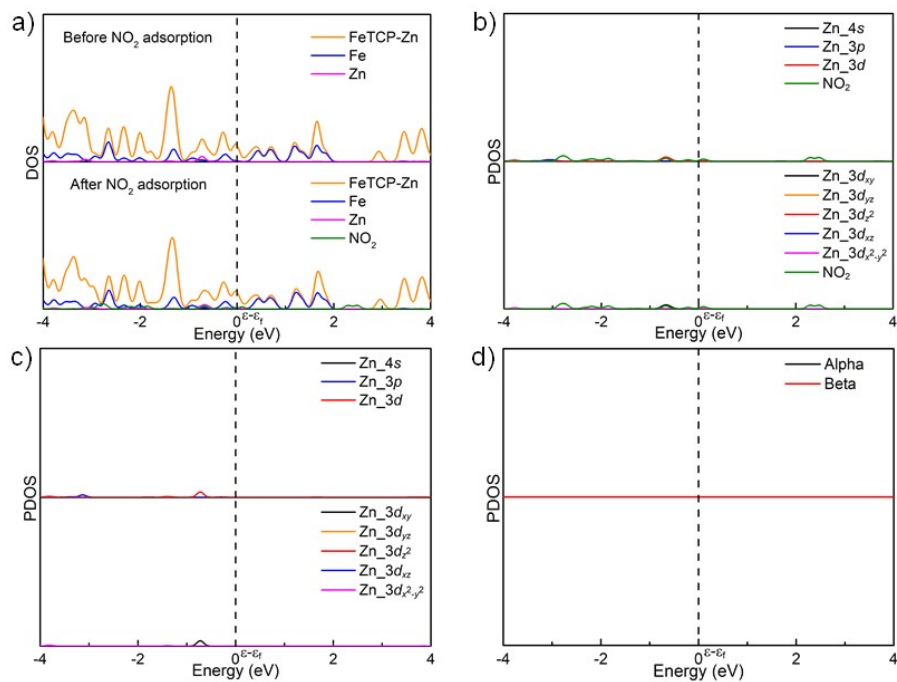

**Fig. S54** (a) The TDOS and PDOS of FeTCP-Zn before and after NO<sub>2</sub> adsorption; (b) The PDOS of NO<sub>2</sub> and Zn-4s, Zn-3p, Zn-3d orbitals of FeTCP-Zn after NO<sub>2</sub> adsorption; (c) The PDOS of Zn-4s, Zn-3p and Zn-3d orbitals of FeTCP-Zn before NO<sub>2</sub> adsorption; (d) The PDOS of electron spin states in Zn-3d<sub>2,2</sub> orbital of FeTCP-Zn.

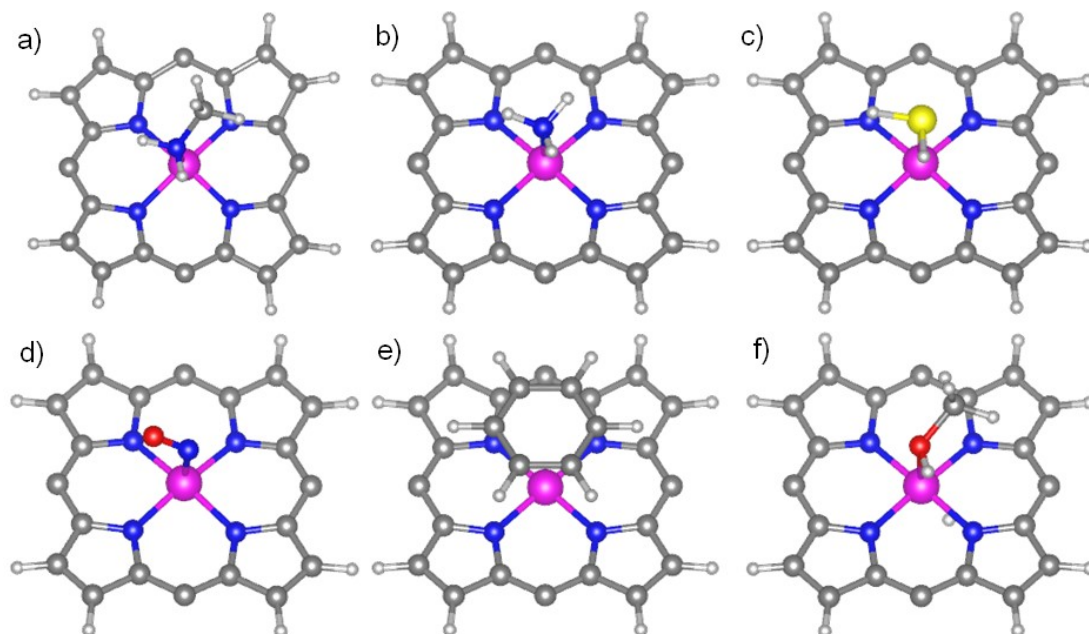

**Fig. S55** The optimal adsorption configurations of different analytes on InTCP-Co, (a) CH<sub>3</sub>NH<sub>2</sub>; (b) NH<sub>3</sub>; (c) H<sub>2</sub>S; (d) NO; (e) C<sub>6</sub>H<sub>6</sub>; (f) CH<sub>3</sub>OH; The other parts in the structure of InTCP-Co have been omitted for clarity in the (a)~(f).

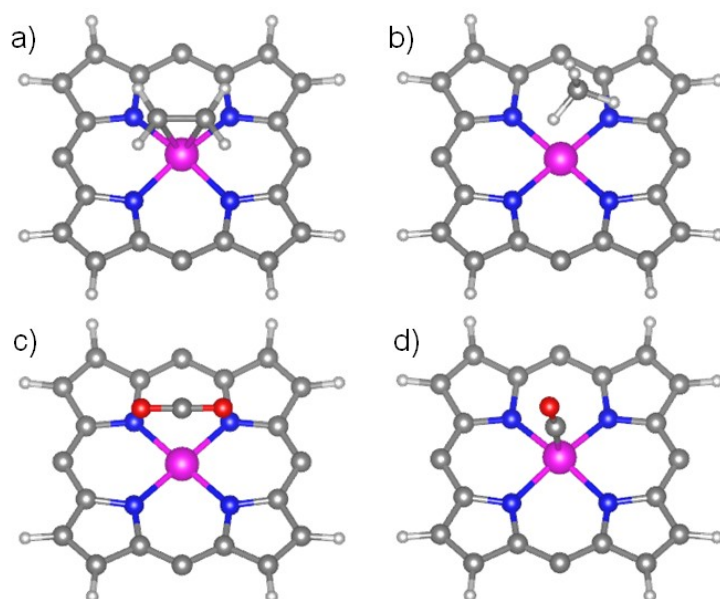

**Fig. S56** The optimal adsorption configurations of different analytes on InTCP-Co, (a)  $\text{CH}_2\text{CH}_2$ ; (b)  $\text{CH}_4$ ; (c)  $\text{CO}_2$ ; (d)  $\text{CO}$ ; The other parts in the structure of InTCP-Co have been omitted for clarity in the (a)~(d).

**Table S4.** The adsorption energy ( $E_{ads}$ ) of the different gas molecular on the InTCP-Co and the nearest atomic distance between the gas molecule and Co in InTCP-Co

|                          | $E_{ads}$ (eV) | $d$ (Co-X, Å) |
|--------------------------|----------------|---------------|
| $\text{NO}_2$            | -3.08          | 1.877         |
| $\text{CH}_3\text{NH}_2$ | -2.41          | 1.954         |
| $\text{NH}_3$            | -0.96          | 2.024         |
| $\text{H}_2\text{S}$     | -0.69          | 2.269         |
| $\text{NO}$              | -1.88          | 1.801         |
| $\text{C}_6\text{H}_6$   | -0.74*         | 3.297         |
| $\text{CH}_3\text{OH}$   | -0.70          | 2.218         |
| $\text{C}_2\text{H}_4$   | -0.72          | 2.184         |
| $\text{CH}_4$            | -0.31          | 2.652         |
| $\text{CO}_2$            | -0.30          | 3.209         |
| $\text{CO}$              | -1.18          | 1.755         |

\*The adsorption energy between  $\text{C}_6\text{H}_6$  and InTCP-Co may cause by the  $\pi$ - $\pi$  interaction between benzene ring and porphyrin ring.

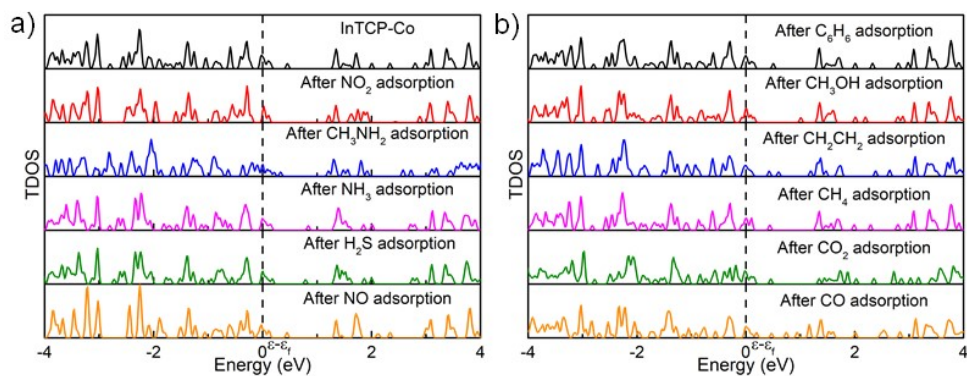

**Fig. S57** The TDOS of InTCP-Co before and after different analytes adsorption.

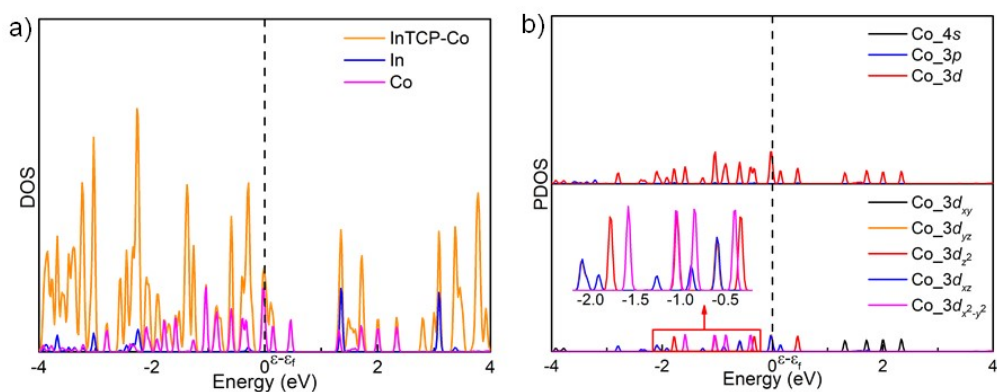

**Fig. S58** (a) The TDOS and PDOS of InTCP-Co before analytes adsorption; (b) The PDOS of Co-4s, Co-3p, Co-3d orbitals of InTCP-Co before analytes adsorption.

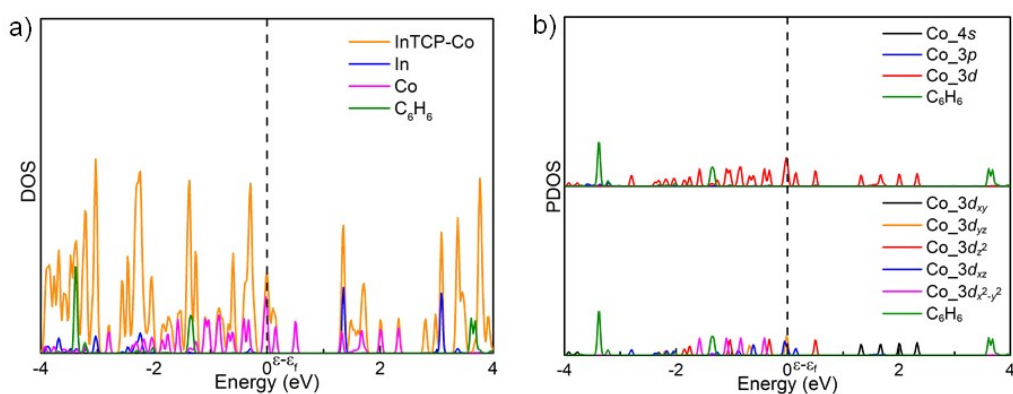

**Fig. S59** (a) The TDOS and PDOS of InTCP-Co after  $C_6H_6$  adsorption; (b) The PDOS of  $C_6H_6$  and Co-4s, Co-3p, Co-3d orbitals of InTCP-Co after  $C_6H_6$  adsorption.

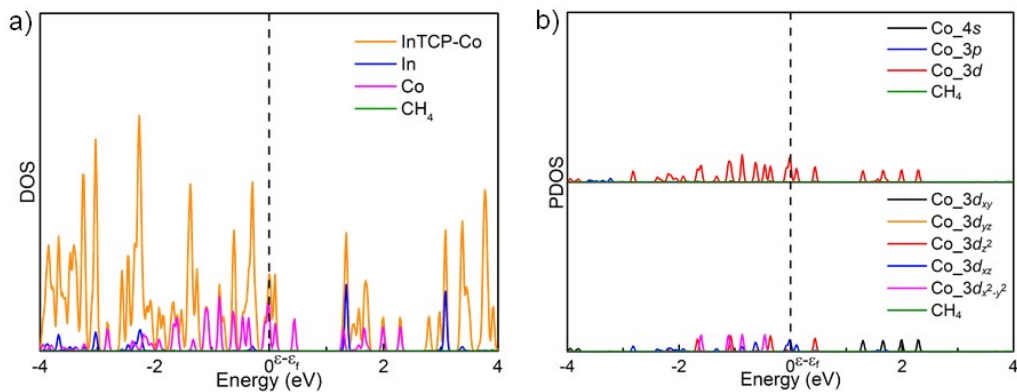

**Fig. S60** (a) The TDOS and PDOS of InTCP-Co after CH<sub>4</sub> adsorption; (b) The PDOS of CH<sub>4</sub> and Co-4s, Co-3p, Co-3d orbitals of InTCP-Co after CH<sub>4</sub> adsorption.

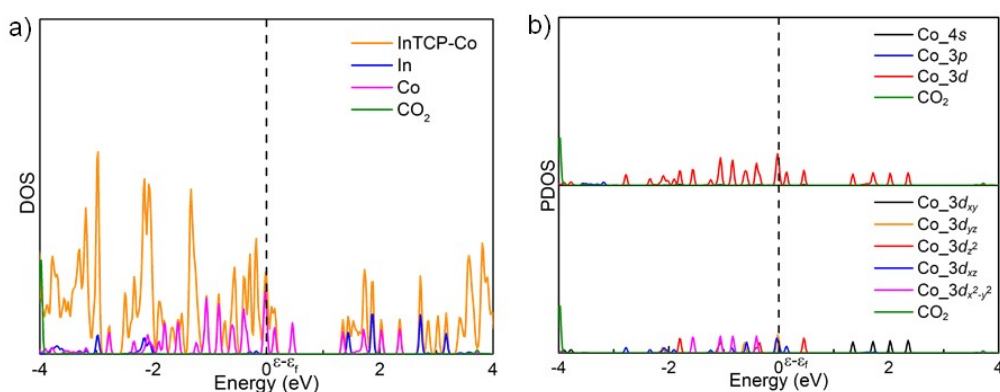

**Fig. S61** (a) The TDOS and PDOS of InTCP-Co after CO<sub>2</sub> adsorption; (b) The PDOS of CO<sub>2</sub> and Co-4s, Co-3p, Co-3d orbitals of InTCP-Co after CO<sub>2</sub> adsorption.

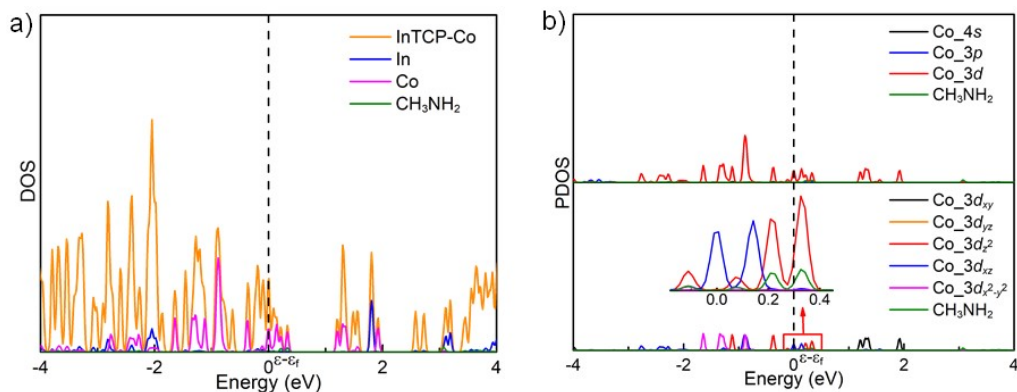

**Fig. S62** (a) The TDOS and PDOS of InTCP-Co after CH<sub>3</sub>NH<sub>2</sub> adsorption; (b) The PDOS of CH<sub>3</sub>NH<sub>2</sub> and Co-4s, Co-3p, Co-3d orbitals of InTCP-Co after CH<sub>3</sub>NH<sub>2</sub> adsorption.

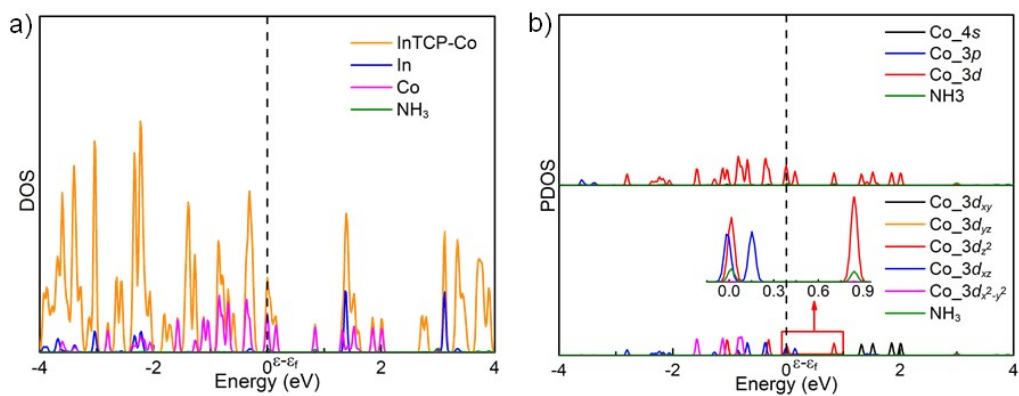

**Fig. S63** (a) The TDOS and PDOS of InTCP-Co after NH<sub>3</sub> adsorption; (b) The PDOS of NH<sub>3</sub> and Co-4s, Co-3p, Co-3d orbitals of InTCP-Co after NH<sub>3</sub> adsorption.

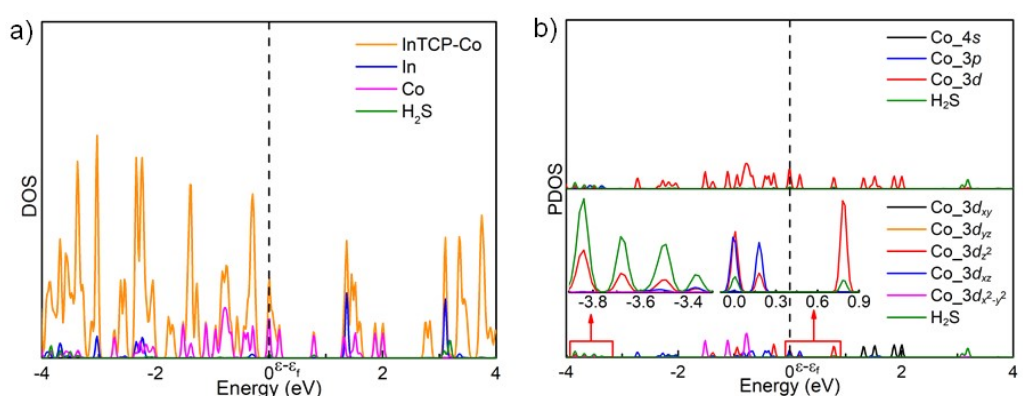

**Fig. S64** (a) The TDOS and PDOS of InTCP-Co after H<sub>2</sub>S adsorption; (b) The PDOS of H<sub>2</sub>S and Co-4s, Co-3p, Co-3d orbitals of InTCP-Co after H<sub>2</sub>S adsorption.

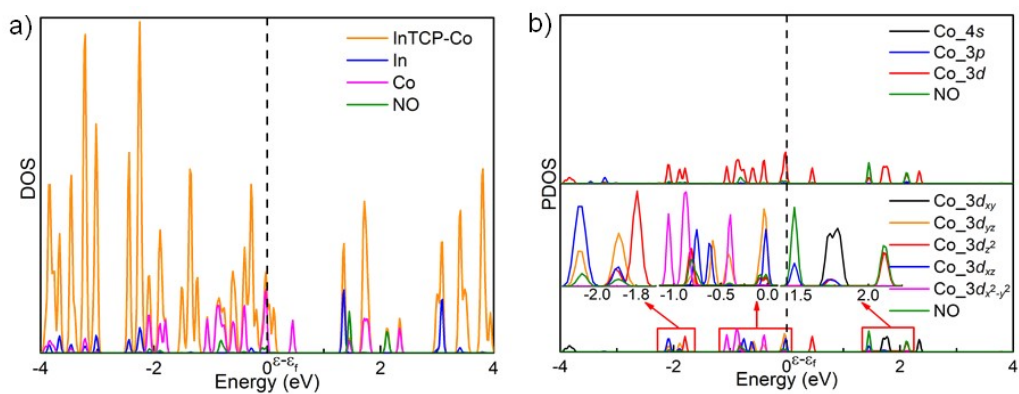

**Fig. S65** (a) The TDOS and PDOS of InTCP-Co after NO adsorption; (b) The PDOS of NO and Co-4s, Co-3p, Co-3d orbitals of InTCP-Co after NO adsorption.



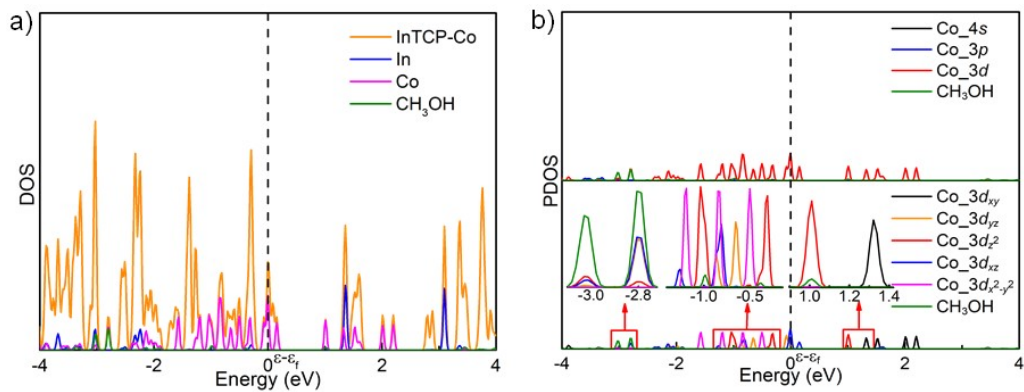

**Fig. S66** (a) The TDOS and PDOS of InTCP-Co after CH<sub>3</sub>OH adsorption; (b) The PDOS of CH<sub>3</sub>OH and Co-4s, Co-3p, Co-3d orbitals of InTCP-Co after CH<sub>3</sub>OH adsorption.

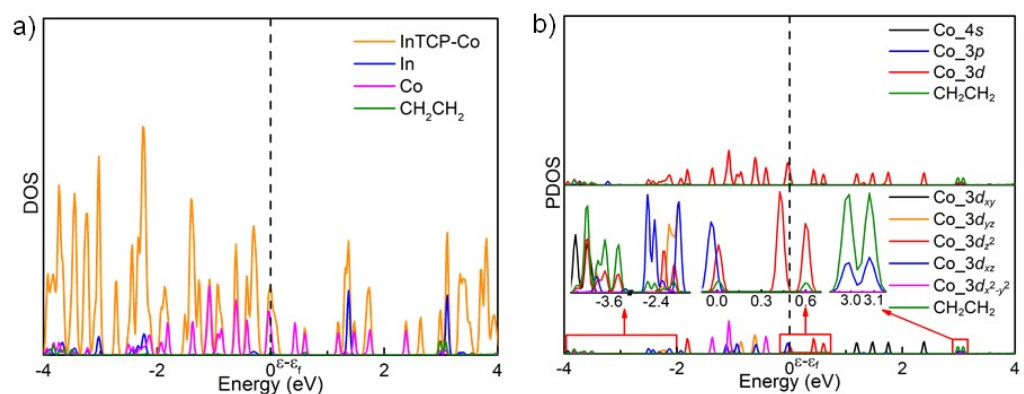

**Fig. S67** (a) The TDOS and PDOS of InTCP-Co after CH<sub>2</sub>CH<sub>2</sub> adsorption; (b) The PDOS of CH<sub>2</sub>CH<sub>2</sub> and Co-4s, Co-3p, Co-3d orbitals of InTCP-Co after CH<sub>2</sub>CH<sub>2</sub> adsorption.

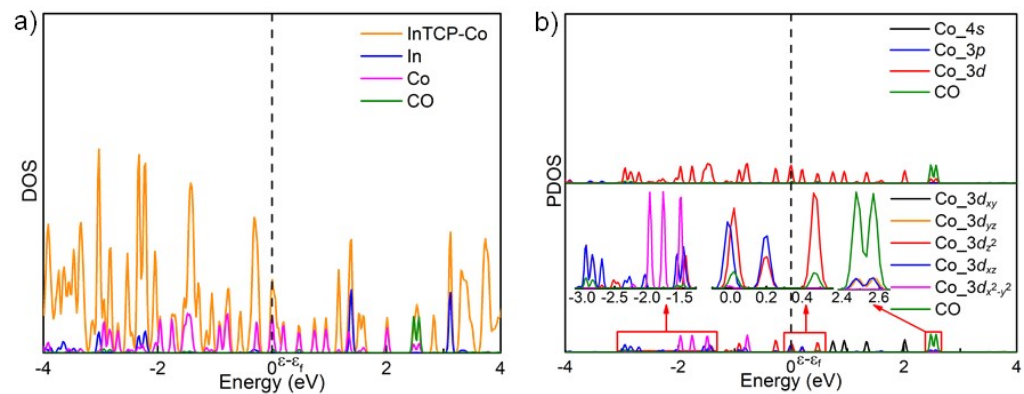

**Fig. S68** (a) The TDOS and PDOS of InTCP-Co after CO adsorption; (b) The PDOS of CO and Co-4s, Co-3p, Co-3d orbitals of InTCP-Co after CO adsorption.

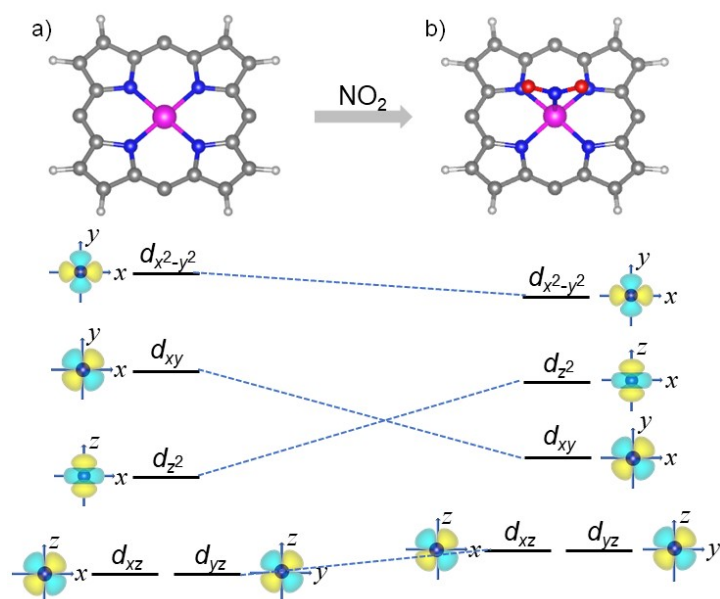

**Fig. S69.** (a) The coordination configuration of Co before InTCP-Co adsorbed  $\text{NO}_2$  and the  $d$  orbitals energy level splitting of Co; (b) The coordination configuration of Co after InTCP-Co adsorbed  $\text{NO}_2$  and the  $d$  orbitals energy level splitting of Co.

## Section 11 References

1. E.-X. Chen, M. Qiu, Y.-F. Zhang, L. He, Y.-Y. Sun, H.-L. Zheng, X. Wu, J. Zhang and Q. Lin, *Angew. Chem. Int. Ed.*, 2022, **61**, e202111622.
2. E.-X. Chen, M. Qiu, Y.-F. Zhang, Y.-S. Zhu, L.-Y. Liu, Y.-Y. Sun, X. Bu, J. Zhang and Q. Lin, *Adv. Mater.*, 2018, **30**, 1704388.
3. W. J. Albery, P. N. Bartlett, C. C. Jones and L. R. Milgrom, *J. Chem. Research (s)*, 1985, 364-365.
4. Y. J. Chen, M. Liu, J. Chen, X. Huang, Q. H. Li, X. L. Ye, G. E. Wang and G. Xu, *Chem. Sci.*, 2023, **14**, 4824-4831.
5. H.-Z. Li, Y. Pan, Q. Li, Q. Lin, D. Lin, F. Wang, G. Xu and J. Zhang, *J. Mater. Chem. A*, 2023, **11**, 965-971.
6. W.-H. Deng, L. He, E.-X. Chen, G.-E. Wang, X.-L. Ye, Z.-H. Fu, Q. Lin and G. Xu, *J. Mater. Chem. A*, 2022, **10**, 12977-12983.
7. Y. Liu, X. Li, X. Li, C. Shao, C. Han, J. Xin, D. Lu, L. Niu, Y. Tang and Y. Liu, *Sens. Actuators B Chem.*, 2022, **365**, 131926.
8. C. Zhang, A. Boudiba, P. De Marco, R. Snyders, M.-G. Olivier and M. Debligny, *Sens. Actuators B Chem.*, 2013, **181**, 395-401.
9. C. Zhang, J. Wang, M.-G. Olivier and M. Debligny, *Sens. Actuators B Chem.*, 2015, **209**, 69-77.
10. T. Wang, Q. Yu, S. Zhang, X. Kou, P. Sun and G. Lu, *Nanoscale*, 2018, **10**, 4841-4851.
11. X. Geng, D. Lahem, C. Zhang, C.-J. Li, M.-G. Olivier and M. Debligny, *Ceram. Int.*, 2019, **45**, 4253-4261.
12. X. Geng, P. Lu, C. Zhang, D. Lahem, M.-G. Olivier and M. Debligny, *Sens. Actuators B Chem.*, 2019, **282**, 690-702.
13. X. Tian, X. Yang, F. Yang and T. Qi, *Colloid. Surface. A*, 2019, **578**, 123621.
14. N. M. Hung, N. M. Hieu, N. D. Chinh, T. T. Hien, N. D. Quang, S. Majumder, G. Choi,

- C. Kim and D. Kim, *Sens. Actuators B Chem.*, 2020, **313**, 128001.
15. D. Liu, Z. Tang and Z. Zhang, *Sens. Actuators B Chem.*, 2020, **324**, 128754.
16. H. Wang, J. Bai, M. Dai, K. Liu, Y. Liu, L. Zhou, F. Liu, F. Liu, Y. Gao, X. Yan and L. Geyu, *Sens. Actuators B Chem.*, 2020, **304**, 127287.
17. J. Wang, C. Hu, Y. Xia and S. Komarneni, *Ceram. Int.*, 2020, **46**, 8462-8468.
18. X.-X. Wang, H.-Y. Li and X. Guo, *J. Mater. Chem. A*, 2020, **8**, 14482-14490.
19. J. Zeng, Y. Niu, Y. Gong, Q. Wang, H. Li, A. Umar, N. F. de Rooij, G. Zhou and Y. Wang, *ACS Sens.*, 2020, **5**, 3172-3181.
20. T. H. Eom, S. H. Cho, J. M. Suh, T. Kim, T. H. Lee, S. E. Jun, J. W. Yang, J. Lee, S.-H. Hong and H. W. Jang, *J. Mater. Chem. A*, 2021, **9**, 11168-11178.
21. C. Han, X. Li, Y. Liu, Y. Tang, M. Liu, X. Li, C. Shao, J. Ma and Y. Liu, *Adv. Sci.*, 2021, **8**, e2102471.
22. Y. M. Jo, K. Lim, J. W. Yoon, Y. K. Jo, Y. K. Moon, H. W. Jang and J. H. Lee, *ACS. Cent. Sci.*, 2021, **7**, 1176-1182.
23. K. Lim, Y. M. Jo, J. W. Yoon, J. S. Kim, D. J. Lee, Y. K. Moon, J. W. Yoon, J. H. Kim, H. J. Choi and J. H. Lee, *Small*, 2021, **17**, e2100438.
24. Y. Xia, S. He, J. Wang, L. Zhou, J. Wang and S. Komarneni, *Chem. Commun.*, 2021, **57**, 9136-9139.
25. T. H. Eom, S. H. Cho, J. M. Suh, T. Kim, J. W. Yang, T. H. Lee, S. E. Jun, S. J. Kim, J. Lee, S. H. Hong and H. W. Jang, *Small*, 2022, **18**, e2106613.
26. Y. Sun, J. Hu and Y. Zhang, *Sens. Actuators B Chem.*, 2022, **367**, 132032.
27. T. Wang, J. Liu, Y. Zhang, Q. Liang, R. Wu, H.-S. Tsai, Y. Wang and J. Hao, *J. Mater. Chem. A*, 2022, **10**, 4306-4315.
28. S. Han, L. Li, C. Ji, X. Liu, G. E. Wang, G. Xu, Z. Sun and J. Luo, *J. Am. Chem. Soc.*, 2023, **145**, 12853-12860.
